# Supplementary material
Source: MDPI journal article supplement (https://www.mdpi.com/2306-5354/1/1/47)
Supplement: s1 [file s1]

## Sheet: Online data
Process time (h)	Broth volume (L)	OUR (mmol/h·L)	CER (mmol/h·L)	RQ
0.000111111	975.641	8.7613	0.0720295	0.00822132
0.014	975.641	15.9721	0.0691618	0.00433017
0.0278889	975.641	19.5166	0.786317	0.0402897
0.0417778	975.641	19.5171	0.78634	0.0402897
0.0556667	975.641	19.5171	0.78634	0.0402897
0.0695556	975.641	19.5172	0.786343	0.0402897
0.0834444	975.779	19.5145	0.786232	0.0402897
0.0973333	975.452	19.5207	0.786482	0.0402897
0.111222	975.789	19.5141	0.786219	0.0402897
0.125111	975.6	19.5178	0.786368	0.0402897
0.139	975.812	19.5138	0.786205	0.0402897
0.152889	976.592	19.4981	0.785575	0.0402897
0.166778	976.4	19.5018	0.785721	0.0402897
0.180667	977	19.4901	0.785249	0.0402897
0.194556	976.459	13.0003	0.523776	0.0402897
0.208444	976.427	13.0008	0.523799	0.0402897
0.222333	976.088	12.66	0.524143	0.0414014
0.236222	975.6	13.0117	0.524238	0.0402897
0.250111	976.2	13.0039	0.523923	0.0402897
0.264	975.624	12.6663	0.5244	0.0414014
0.277889	975.865	13.0087	0.524116	0.0402897
0.291778	975.8	13.0095	0.524149	0.0402897
0.305667	975.684	13.0105	0.52419	0.0402897
0.319556	975.327	13.0153	0.524384	0.0402897
0.333444	975.8	13.0092	0.524135	0.0402897
0.347333	975.8	13.0093	0.524141	0.0402897
0.361222	975.972	13.0069	0.524046	0.0402897
0.375111	976.191	13.0044	0.523944	0.0402897
0.389	975.905	13.0075	0.524069	0.0402897
0.402889	975.312	13.0159	0.524408	0.0402897
0.416778	976.088	13.0053	0.523978	0.0402897
0.430667	976	12.5744	0.856341	0.068102
0.444556	975.781	13.0097	0.524159	0.0402897
0.458444	976.352	13.0018	0.523839	0.0402897
0.472333	976.4	13.0015	0.523826	0.0402897
0.486222	976.544	12.9994	0.523741	0.0402897
0.500111	976.323	13.0024	0.523863	0.0402897
0.514	976.396	13.0013	0.523818	0.0402897
0.527889	976.228	13.0035	0.523906	0.0402897
0.541778	975.76	13.0099	0.524165	0.0402897
0.555667	975.848	12.9814	0.628444	0.0484112
0.569556	976.4	13.0012	0.523816	0.0402897
0.583444	976.059	13.0062	0.524015	0.0402897
0.597333	976.8	12.9955	0.523586	0.0402897
0.611222	976.8	12.9955	0.523583	0.0402897
0.625111	977	12.9932	0.523494	0.0402897
0.639	976.761	12.9964	0.523622	0.0402897
0.652889	976.226	13.003	0.523888	0.0402897
0.666778	976.4	13.001	0.523806	0.0402897
0.680667	976.624	12.9981	0.523691	0.0402897
0.694556	976.988	12.9935	0.523503	0.0402897
0.708444	976.592	12.999	0.523726	0.0402897
0.722333	977.008	12.9935	0.523503	0.0402897
0.736222	976.6	12.9986	0.523709	0.0402897
0.750111	977.095	12.992	0.523443	0.0402897
0.764	977.114	12.9908	0.523397	0.0402897
0.777889	976.951	12.9942	0.523531	0.0402897
0.791778	976.8	12.9957	0.523594	0.0402897
0.805667	977.023	12.9927	0.523474	0.0402897
0.819556	977.112	12.9918	0.523437	0.0402897
0.833444	977.21	12.9902	0.523371	0.0402897
0.847333	978.016	12.9797	0.522948	0.0402897
0.861222	978.2	12.9776	0.522863	0.0402897
0.875111	978.068	12.9379	0.680123	0.0525683
0.889	977.548	12.9861	0.523206	0.0402897
0.902889	976.872	12.9949	0.52356	0.0402897
0.916778	977.6	12.9855	0.523181	0.0402897
0.930667	977.665	12.9845	0.523143	0.0402897
0.944556	978.032	12.9795	0.522942	0.0402897
0.958444	977.383	12.9881	0.523287	0.0402897
0.972333	977.752	12.9833	0.523092	0.0402897
0.986222	977.94	12.9806	0.522983	0.0402897
1.00011	977.832	12.9818	0.523033	0.0402897
1.014	977.6	12.9851	0.523165	0.0402897
1.02789	977.627	12.9852	0.523169	0.0402897
1.04178	977.708	12.9838	0.523115	0.0402897
1.05567	977.4	12.9877	0.52327	0.0402897
1.06956	976.8	12.996	0.523607	0.0402897
1.08344	977.272	12.9899	0.523359	0.0402897
1.09733	977.266	12.9896	0.523349	0.0402897
1.11122	977.2	12.9905	0.523382	0.0402897
1.12511	977.6	12.9857	0.523189	0.0402897
1.139	977.4	12.988	0.523283	0.0402897
1.15289	976.77	12.9964	0.523623	0.0402897
1.16678	976	13.0068	0.524039	0.0402897
1.18067	976.404	13.0013	0.523819	0.0402897
1.19456	976.412	13.0007	0.523794	0.0402897
1.20844	977.172	12.9909	0.5234	0.0402897
1.22233	976.865	12.995	0.523567	0.0402897
1.23622	976.909	12.9943	0.523535	0.0402897
1.25011	977	12.9936	0.52351	0.0402897
1.264	976.971	12.9937	0.523512	0.0402897
1.27789	977.116	11.9995	0.523916	0.0436615
1.29178	977.2	12.9766	0.523399	0.0403339
1.30567	977.051	12.9928	0.523477	0.0402897
1.31956	976.976	12.9933	0.523497	0.0402897
1.33344	977.428	12.9879	0.523281	0.0402897
1.34733	977.476	12.987	0.523245	0.0402897
1.36122	977.464	12.9871	0.523246	0.0402897
1.37511	977.284	12.9896	0.523347	0.0402897
1.389	977.366	12.9882	0.52329	0.0402897
1.40289	977.272	12.9896	0.523349	0.0402897
1.41678	977.2	12.9909	0.5234	0.0402897
1.43067	977.501	12.9867	0.523231	0.0402897
1.44456	977.4	12.9877	0.523272	0.0402897
1.45844	977.4	12.9879	0.523277	0.0402897
1.47233	977.118	12.9643	0.627615	0.0484112
1.48622	977.2	12.9907	0.52339	0.0402897
1.50011	977.499	12.9866	0.523227	0.0402897
1.514	978.6	12.972	0.522638	0.0402897
1.52789	978	12.9801	0.522964	0.0402897
1.54178	978.4	12.9743	0.52273	0.0402897
1.55567	978.4	12.9473	0.626796	0.0484112
1.56956	978.46	12.9739	0.522713	0.0402897
1.58344	978.8	12.9695	0.522537	0.0402897
1.59733	978.8	12.9695	0.522539	0.0402897
1.61122	978.8	12.9693	0.522529	0.0402897
1.62511	978.6	12.972	0.522638	0.0402897
1.639	978.6	12.9722	0.522646	0.0402897
1.65289	978.732	12.9706	0.522581	0.0402897
1.66678	978.852	12.928	0.679602	0.0525683
1.68067	979.284	12.963	0.522276	0.0402897
1.69456	979.481	12.8471	0.954949	0.074332
1.70844	979.168	12.9648	0.522348	0.0402897
1.72233	978.861	12.9111	0.743277	0.0575689
1.73622	978.792	12.8561	0.955622	0.074332
1.75011	979.208	12.964	0.522316	0.0402897
1.764	979	12.9666	0.522422	0.0402897
1.77789	979.648	12.9582	0.522082	0.0402897
1.79178	979.779	12.7922	1.14982	0.089884
1.80567	979.492	12.9025	0.74278	0.0575689
1.81956	979.8	12.7895	1.15826	0.0905631
1.83344	979.47	12.7932	1.15859	0.0905631
1.84733	979.316	12.7957	1.15882	0.0905631
1.86122	979.527	12.7927	1.15854	0.0905631
1.87511	979.68	12.9556	0.530546	0.0409511
1.889	979.788	12.7898	1.15829	0.0905631
1.90289	980.212	12.7843	1.15779	0.0905631
1.91678	979.612	12.7919	1.15847	0.0905631
1.93067	979.6	12.7922	1.1585	0.0905631
1.94456	980.537	12.7796	1.15736	0.0905631
1.95844	980.209	12.7843	1.15779	0.0905631
1.97233	979.943	12.7877	1.15809	0.0905631
1.98622	979.428	12.7942	1.15868	0.0905631
2.00011	979.685	12.7912	1.15841	0.0905631
2.014	978.843	12.8018	1.15937	0.0905631
2.02789	979.129	12.798	1.15903	0.0905631
2.04178	979.466	12.7936	1.15863	0.0905631
2.05567	979.8	12.7897	1.15827	0.0905631
2.06956	979.336	12.7954	1.15879	0.0905631
2.08344	979.6	12.7919	1.15848	0.0905631
2.09733	980.112	12.7852	1.15787	0.0905631
2.11122	980.088	12.7859	1.15793	0.0905631
2.12511	979.408	12.7944	1.1587	0.0905631
2.139	979.565	12.7924	1.15852	0.0905631
2.15289	979.2	12.7974	1.15897	0.0905631
2.16678	979.2	12.7967	1.15891	0.0905631
2.18067	978.854	12.8018	1.15938	0.0905631
2.19456	978.984	12.8003	1.15923	0.0905631
2.20844	979.108	12.7985	1.15907	0.0905631
2.22233	978.664	12.8046	1.15962	0.0905631
2.23622	977.856	12.8147	1.16054	0.0905631
2.25011	977.169	12.8237	1.16136	0.0905631
2.264	976.4	13.1649	1.16209	0.0882712
2.27789	976.516	13.1633	1.16194	0.0882712
2.29178	976.084	13.1691	1.16246	0.0882712
2.30567	975.684	13.1745	1.16293	0.0882712
2.31956	975.794	13.173	1.1628	0.0882712
2.33344	975.4	13.1783	1.16326	0.0882712
2.34733	974.076	13.1961	1.16484	0.0882712
2.36122	942.777	13.6347	1.20355	0.0882712
2.37511	983.589	13.0685	1.15357	0.0882712
2.389	983.996	13.0634	1.15312	0.0882712
2.40289	981.632	13.0948	1.1559	0.0882712
2.41678	981.64	13.0949	1.15591	0.0882712
2.43067	967.228	14.292	1.17252	0.0820399
2.44456	969.72	14.2553	1.1695	0.0820399
2.45844	969.72	14.2544	1.16943	0.0820399
2.47233	969.72	14.2551	1.16949	0.0820399
2.48622	969.72	14.2551	1.16949	0.0820399
2.50011	969.72	14.2552	1.1695	0.0820399
2.514	969.72	14.2553	1.1695	0.0820399
2.52789	969.72	13.5746	1.16989	0.0861826
2.54178	969.72	14.2549	1.16947	0.0820399
2.55567	970.028	13.9034	1.16932	0.0841036
2.56956	970.312	13.928	1.16899	0.0839313
2.58344	971.2	14.2187	1.16767	0.0821221
2.59733	971.2	14.233	1.16767	0.0820399
2.61122	971	14.2362	1.16794	0.0820399
2.62511	972.244	14.2182	1.16646	0.0820399
2.639	972.424	14.2151	1.1662	0.0820399
2.65289	972.672	14.212	1.16595	0.0820399
2.66678	973.015	14.2073	1.16557	0.0820399
2.68067	972.626	13.8667	1.16624	0.0841036
2.69456	973.126	14.2051	1.16538	0.0820399
2.70844	973.4	14.2013	1.16508	0.0820399
2.72233	973.2	14.2041	1.1653	0.0820399
2.73622	973.488	14.1997	1.16494	0.0820399
2.75011	973.432	13.2193	1.16563	0.0881763
2.764	974.005	13.1971	1.16493	0.0882712
2.77789	974.145	13.5134	1.16462	0.0861826
2.79178	974.365	13.2063	1.16449	0.0881763
2.80567	974.806	13.1863	1.16397	0.0882712
2.81956	974.996	13.1843	1.16379	0.0882712
2.83344	975.269	13.1799	1.16341	0.0882712
2.84733	974.8	13.1863	1.16398	0.0882712
2.86122	974.906	13.1849	1.16385	0.0882712
2.87511	975.192	13.1813	1.16353	0.0882712
2.889	975.628	13.1751	1.16298	0.0882712
2.90289	975.556	13.1767	1.16313	0.0882712
2.91678	975.286	13.18	1.16341	0.0882712
2.93067	974.952	13.1846	1.16382	0.0882712
2.94456	975.524	13.1766	1.16312	0.0882712
2.95844	975.752	13.1736	1.16285	0.0882712
2.97233	976.4	13.1649	1.16209	0.0882712
2.98622	976.245	13.1668	1.16225	0.0882712
3.00011	976.749	13.1604	1.16169	0.0882712
3.014	976.2	13.1677	1.16233	0.0882712
3.02789	976.4	12.3182	1.81398	0.14726
3.04178	976.528	13.1631	1.16193	0.0882712
3.05567	976.244	13.1668	1.16225	0.0882712
3.06956	976.508	13.1635	1.16196	0.0882712
3.08344	975.831	14.1515	1.16215	0.0821221
3.09733	976.4	13.165	1.16209	0.0882712
3.11122	976.6	13.077	1.48745	0.113746
3.12511	976.6	13.1624	1.16186	0.0882712
3.139	976.8	13.0779	1.47441	0.112741
3.15289	975.928	13.1714	1.16265	0.0882712
3.16678	976.132	13.1685	1.1624	0.0882712
3.18067	976.716	13.4236	1.47427	0.109827
3.19456	976.951	13.3489	1.63989	0.122849
3.20844	977	14.1478	1.1672	0.0825007
3.22233	976.968	13.0752	1.47411	0.112741
3.23622	977.168	13.0295	1.63978	0.125851
3.25011	976.892	13.0327	1.64018	0.125851
3.264	976.052	13.0445	1.64166	0.125851
3.27789	975.124	13.3738	1.64295	0.122849
3.29178	974.794	14.0558	1.6431	0.116898
3.30567	974.404	14.0611	1.64371	0.116898
3.31956	974.497	14.0601	1.6436	0.116898
3.33344	974.661	14.0572	1.64326	0.116898
3.34733	974.045	14.0662	1.64432	0.116898
3.36122	973.8	14.0695	1.6447	0.116898
3.37511	973.8	14.0702	1.64478	0.116898
3.389	973.6	14.0726	1.64506	0.116898
3.40289	973.428	14.7387	1.64489	0.111603
3.41678	973.699	14.7347	1.64444	0.111603
3.43067	973.2	14.5233	1.64543	0.113296
3.44456	973.352	14.7401	1.64504	0.111603
3.45844	973.772	14.7332	1.64427	0.111603
3.47233	973.4	14.7392	1.64495	0.111603
3.48622	973.932	14.7315	1.64409	0.111603
3.50011	974.155	14.728	1.6437	0.111603
3.514	974.6	14.7209	1.6429	0.111603
3.52789	974.6	14.6152	1.64298	0.112416
3.54178	974.4	14.717	1.64326	0.111657
3.55567	974.6	14.7209	1.6429	0.111603
3.56956	975.112	14.7134	1.64207	0.111603
3.58344	974.776	14.7182	1.6426	0.111603
3.59733	974.108	14.5097	1.64389	0.113296
3.61122	973.827	14.7328	1.64422	0.111603
3.62511	972.962	14.7456	1.64565	0.111603
3.639	972.676	14.75	1.64615	0.111603
3.65289	972.674	14.7504	1.6462	0.111603
3.66678	971.4	14.7703	1.64841	0.111603
3.68067	971.776	14.7639	1.64769	0.111603
3.69456	971.891	14.7618	1.64747	0.111603
3.70844	972.4	14.7543	1.64663	0.111603
3.72233	972.874	15.411	1.64537	0.106766
3.73622	973.269	14.7413	1.64518	0.111603
3.75011	974.441	14.7235	1.64319	0.111603
3.764	974.656	14.7205	1.64285	0.111603
3.77789	974.432	14.7232	1.64315	0.111603
3.79178	974.489	14.7228	1.64312	0.111603
3.80567	974.424	14.7242	1.64327	0.111603
3.81956	975.376	14.7092	1.6416	0.111603
3.83344	975.024	14.3837	1.64247	0.11419
3.84733	975.592	14.7062	1.64126	0.111603
3.86122	975.4	14.7091	1.64158	0.111603
3.87511	975.008	14.7151	1.64226	0.111603
3.889	975.488	14.7076	1.64142	0.111603
3.90289	975.514	14.4819	1.64154	0.113351
3.91678	975.572	14.7066	1.64131	0.111603
3.93067	975.739	14.7039	1.641	0.111603
3.94456	975.6	14.7061	1.64124	0.111603
3.95844	976.172	14.6977	1.64031	0.111603
3.97233	976.448	14.6935	1.63984	0.111603
3.98622	976.2	14.6969	1.64023	0.111603
4.00011	977	14.6851	1.63891	0.111603
4.014	976.4	14.6944	1.63994	0.111603
4.02789	976.214	14.6971	1.64024	0.111603
4.04178	976.8	14.6879	1.63922	0.111603
4.05567	976.6	14.6912	1.63959	0.111603
4.06956	976.4	14.5884	1.63996	0.112416
4.08344	976.4	14.6868	1.63989	0.111657
4.09733	976.575	14.6917	1.63964	0.111603
4.11122	976.636	14.6909	1.63955	0.111603
4.12511	975.984	14.7008	1.64066	0.111603
4.139	977.4	14.6791	1.63824	0.111603
4.15289	977.109	14.6834	1.63872	0.111603
4.16678	976.8	14.688	1.63923	0.111603
4.18067	976.636	14.6906	1.63952	0.111603
4.19456	977	14.5793	1.63894	0.112416
4.20844	977.548	14.6696	1.63796	0.111657
4.22233	977.501	14.6777	1.63808	0.111603
4.23622	977.4	14.6793	1.63825	0.111603
4.25011	977.6	14.6758	1.63787	0.111603
4.264	978.032	14.6695	1.63716	0.111603
4.27789	977.568	14.6763	1.63792	0.111603
4.29178	976.871	14.6869	1.63911	0.111603
4.30567	977.612	14.6757	1.63786	0.111603
4.31956	978.384	14.6112	1.84052	0.125966
4.33344	977.6	14.674	1.64642	0.1122
4.34733	978.196	14.6097	1.85788	0.127168
4.36122	978.2	14.6135	1.84081	0.125966
4.37511	978.2	14.5001	2.27425	0.156843
4.389	978.2	14.6094	1.85785	0.127168
4.40289	978	14.5031	2.27471	0.156843
4.41678	978.744	14.4924	2.27304	0.156843
4.43067	978.381	14.4977	2.27386	0.156843
4.44456	978.4	14.4973	2.2738	0.156843
4.45844	978.701	14.1622	2.27329	0.160518
4.47233	978.874	14.4904	2.27271	0.156843
4.48622	979.366	14.1534	2.27187	0.160518
4.50011	978.868	14.4836	2.27276	0.15692
4.514	980.115	14.4717	2.26979	0.156843
4.52789	979.496	14.4812	2.27128	0.156843
4.54178	979.024	14.4877	2.2723	0.156843
4.55567	978.464	14.4967	2.27371	0.156843
4.56956	977.508	14.5107	2.2759	0.156843
4.58344	976.8	14.5206	2.27746	0.156843
4.59733	976.371	14.2815	2.38296	0.166857
4.61122	975.872	15.1969	2.27917	0.149976
4.62511	975.564	15.2017	2.27989	0.149976
4.639	975	15.2105	2.28122	0.149976
4.65289	975.2	15.2073	2.28073	0.149976
4.66678	975.252	15.2068	2.28065	0.149976
4.68067	975.348	15.205	2.28039	0.149976
4.69456	974.99	15.211	2.28128	0.149976
4.70844	974.832	15.2129	2.28157	0.149976
4.72233	975	15.211	2.28128	0.149976
4.73622	975.368	15.2048	2.28036	0.149976
4.75011	975.2	15.2076	2.28077	0.149976
4.764	975.2	15.2073	2.28074	0.149976
4.77789	976.6	15.1858	2.2775	0.149976
4.79178	976.403	15.189	2.27798	0.149976
4.80567	976.65	15.1845	2.2773	0.149976
4.81956	976.604	15.1859	2.27751	0.149976
4.83344	976.525	15.1865	2.27761	0.149976
4.84733	976.286	15.1903	2.27818	0.149976
4.86122	976.014	15.1946	2.27882	0.149976
4.87511	975.371	15.2042	2.28027	0.149976
4.889	975.744	15.1988	2.27945	0.149976
4.90289	976.139	15.8538	2.27793	0.143684
4.91678	975.8	15.205	2.27933	0.149906
4.93067	975.868	15.6268	2.27889	0.145832
4.94456	975.746	15.4101	2.27929	0.147909
4.95844	975.4	15.8663	2.27973	0.143684
4.97233	975.925	15.858	2.27854	0.143684
4.98622	976	15.8567	2.27835	0.143684
5.00011	975.837	15.8592	2.27871	0.143684
5.014	976.171	15.8538	2.27793	0.143684
5.02789	976.072	15.8555	2.27818	0.143684
5.04178	976.692	15.8454	2.27672	0.143684
5.05567	976.39	15.8501	2.27741	0.143684
5.06956	975.8	15.8596	2.27876	0.143684
5.08344	976.128	15.7308	2.75067	0.174859
5.09733	975.891	15.8149	2.44469	0.154581
5.11122	975.777	15.7752	2.60474	0.165116
5.12511	975.901	15.8585	2.2786	0.143684
5.139	976	15.7318	2.75752	0.175284
5.15289	976.539	15.7228	2.75595	0.175284
5.16678	976.4	15.8489	2.28386	0.144102
5.18067	976.168	15.7285	2.75695	0.175284
5.19456	975.421	15.7406	2.75906	0.175284
5.20844	975.893	15.733	2.75774	0.175284
5.22233	976.212	15.7276	2.75679	0.175284
5.23622	976.388	15.725	2.75633	0.175284
5.25011	976.2	15.7281	2.75688	0.175284
5.264	976.393	15.7251	2.75636	0.175284
5.27789	975.805	15.7347	2.75803	0.175284
5.29178	975.6	15.7382	2.75864	0.175284
5.30567	975.507	15.7393	2.75885	0.175284
5.31956	975.687	15.7367	2.75838	0.175284
5.33344	975.743	15.736	2.75826	0.175284
5.34733	975.543	15.739	2.75879	0.175284
5.36122	975.16	15.7447	2.75979	0.175284
5.37511	975.4	14.4308	2.76036	0.191283
5.389	975.584	16.1679	2.75828	0.170603
5.40289	975.4	15.7413	2.75919	0.175284
5.41678	975.524	15.7396	2.7589	0.175284
5.43067	975.972	15.7319	2.75755	0.175284
5.44456	976.519	16.7146	2.75504	0.164829
5.45844	976.2	16.7209	2.75609	0.164829
5.47233	976.6	16.3693	2.75524	0.168318
5.48622	976.274	15.7263	2.75656	0.175284
5.50011	975.4	16.7197	2.75822	0.164968
5.514	975.704	16.3981	2.75772	0.168173
5.52789	975.635	16.6247	2.75773	0.165882
5.54178	975.8	16.397	2.75753	0.168173
5.55567	975.8	16.3965	2.75745	0.168173
5.56956	975.8	16.3967	2.75748	0.168173
5.58344	975.503	16.7251	2.75795	0.164899
5.59733	975.6	16.611	2.75781	0.166023
5.61122	975.672	16.7297	2.75753	0.164829
5.62511	976.2	16.7207	2.75605	0.164829
5.639	976.165	16.6014	2.75622	0.166023
5.65289	975.499	16.6271	2.75813	0.165882
5.66678	975.042	16.4096	2.75965	0.168173
5.68067	975.8	16.5093	2.75738	0.167019
5.69456	975.699	16.6236	2.75755	0.165882
5.70844	976.128	16.391	2.75652	0.168173
5.72233	976.4	16.4307	3.3942	0.206577
5.73622	976.588	16.442	3.39362	0.206399
5.75011	975.758	16.5547	3.39642	0.205164
5.764	975.607	16.5637	3.39682	0.205076
5.77789	976.2	16.2233	3.39519	0.209278
5.79178	976.408	16.2194	3.39437	0.209278
5.80567	976.264	16.2218	3.39487	0.209278
5.81956	976.331	16.2209	3.39468	0.209278
5.83344	976.392	16.5432	3.39408	0.205164
5.84733	976.714	16.2143	3.3933	0.209278
5.86122	976.286	16.2216	3.39482	0.209278
5.87511	976.432	16.2192	3.39433	0.209278
5.889	975.683	16.5627	3.39662	0.205076
5.90289	975.552	16.4594	3.3972	0.206399
5.91678	975.514	16.2343	3.39748	0.209278
5.93067	976.022	16.3387	3.39565	0.207829
5.94456	976.189	16.2232	3.39516	0.209278
5.95844	976.4	16.219	3.39429	0.209278
5.97233	976.49	16.2178	3.39403	0.209278
5.98622	975.692	16.2317	3.39694	0.209278
6.00011	976	16.8745	3.39529	0.201208
6.014	976.061	16.7672	3.39505	0.202481
6.02789	975.872	16.8904	3.39564	0.20104
6.04178	976.112	16.886	3.39475	0.20104
6.05567	976.399	16.994	3.39373	0.199702
6.06956	976.8	16.8742	3.39239	0.20104
6.08344	976.756	16.8751	3.39256	0.20104
6.09733	977.222	16.8671	3.39096	0.20104
6.11122	977.2	16.8669	3.39092	0.20104
6.12511	977.2	16.8667	3.39089	0.20104
6.139	976.768	16.8748	3.3925	0.20104
6.15289	976.41	16.8814	3.39383	0.20104
6.16678	976.8	16.8742	3.39239	0.20104
6.18067	976.8	16.8747	3.39248	0.20104
6.19456	976.4	16.7962	3.71953	0.22145
6.20844	976.588	16.8775	3.39305	0.20104
6.22233	975.922	16.8895	3.39546	0.20104
6.23622	975.8	16.8514	3.5492	0.210617
6.25011	975.416	16.7728	3.8767	0.23113
6.264	974.972	17.7737	3.87736	0.218152
6.27789	974.806	16.3955	3.8795	0.23662
6.29178	975.544	17.7	3.87518	0.218937
6.30567	975.343	17.767	3.87591	0.218152
6.31956	975.569	17.7631	3.87505	0.218152
6.33344	975.048	17.7719	3.87697	0.218152
6.34733	974.65	17.7794	3.87861	0.218152
6.36122	974.793	17.7771	3.87812	0.218152
6.37511	974.6	17.7805	3.87884	0.218152
6.389	974.468	17.7832	3.87945	0.218152
6.40289	974.059	17.7907	3.88108	0.218152
6.41678	974.17	17.7889	3.88069	0.218152
6.43067	974.028	17.7909	3.88112	0.218152
6.44456	974.024	17.7912	3.88118	0.218152
6.45844	974.624	17.7807	3.87888	0.218152
6.47233	974.924	17.7746	3.87756	0.218152
6.48622	974.4	17.7845	3.87972	0.218152
6.50011	974.508	17.7827	3.87933	0.218152
6.514	975.075	17.772	3.87699	0.218152
6.52789	975.328	17.7676	3.87603	0.218152
6.54178	975.557	17.763	3.87504	0.218152
6.55567	975.364	17.7672	3.87594	0.218152
6.56956	975.33	17.7672	3.87594	0.218152
6.58344	975.419	17.7661	3.8757	0.218152
6.59733	975.104	17.7717	3.87694	0.218152
6.61122	975.084	17.772	3.877	0.218152
6.62511	975.158	17.7706	3.87668	0.218152
6.639	975.4	17.7658	3.87564	0.218152
6.65289	975.4	17.766	3.87568	0.218152
6.66678	975	18.4219	3.87672	0.210441
6.68067	975.388	18.4284	3.87511	0.210279
6.69456	975.055	18.3808	4.08094	0.222021
6.70844	974.876	18.2707	4.51669	0.24721
6.72233	974.428	18.2792	4.51879	0.24721
6.73622	973.817	18.2905	4.5216	0.24721
6.75011	973.743	18.2924	4.52206	0.24721
6.764	973.6	18.295	4.5227	0.24721
6.77789	973.552	18.2961	4.52297	0.24721
6.79178	973.524	18.2962	4.52301	0.24721
6.80567	973.276	18.3006	4.52409	0.24721
6.81956	973.068	18.3049	4.52515	0.24721
6.83344	973	18.3064	4.52554	0.24721
6.84733	972.8	18.3098	4.52638	0.24721
6.86122	973.2	18.3026	4.52458	0.24721
6.87511	973.624	18.2943	4.52254	0.24721
6.889	974.037	18.2872	4.52079	0.24721
6.90289	974.4	18.2803	4.51908	0.24721
6.91678	974.568	18.2766	4.51816	0.24721
6.93067	974.851	18.272	4.51701	0.24721
6.94456	974.497	18.2784	4.51861	0.24721
6.95844	974.8	18.2726	4.51718	0.24721
6.97233	974.8	18.2721	4.51704	0.24721
6.98622	974.6	18.3819	4.51793	0.245782
7.00011	974.408	18.6113	4.51862	0.242789
7.014	974.336	18.4924	4.51899	0.24437
7.02789	974.37	18.6118	4.51875	0.242789
7.04178	974.351	18.6111	4.51857	0.242789
7.05567	974.2	18.3967	4.51983	0.245687
7.06956	973.548	18.5876	4.67632	0.251583
7.08344	973.4	18.5051	5.00384	0.270403
7.09733	973.4	18.5046	5.00371	0.270403
7.11122	973.261	18.5077	5.00455	0.270403
7.12511	973.536	18.1704	5.00342	0.275361
7.139	973.122	18.1789	5.00575	0.275361
7.15289	973.478	18.1726	5.00402	0.275361
7.16678	973.933	18.1636	5.00153	0.275361
7.18067	974.396	18.1549	4.99915	0.275361
7.19456	974.304	18.1572	4.99977	0.275361
7.20844	974.192	18.1594	5.0004	0.275361
7.22233	974.8	18.1473	4.99705	0.275361
7.23622	974.886	18.3646	4.99648	0.272071
7.25011	974.419	18.4791	4.99872	0.270507
7.264	974.972	18.3555	4.99593	0.272176
7.27789	975.2	18.4711	4.99465	0.270403
7.29178	975.2	18.4708	4.99458	0.270403
7.30567	975.517	18.4646	4.99288	0.270403
7.31956	975.268	18.4693	4.99416	0.270403
7.33344	974.6	18.4819	4.99758	0.270403
7.34733	975.2	18.4712	4.99468	0.270403
7.36122	975.2	18.4712	4.99468	0.270403
7.37511	974.088	18.8159	4.99979	0.265721
7.389	974.2	18.4902	4.99981	0.270403
7.40289	974.502	18.456	5.10705	0.276715
7.41678	974.708	18.4808	4.99727	0.270403
7.43067	974.154	18.4911	5.00007	0.270403
7.44456	974.115	18.4918	5.00024	0.270403
7.45844	974.2	18.4893	4.99958	0.270403
7.47233	974.2	18.4906	4.99993	0.270403
7.48622	974.2	18.6152	4.51956	0.242789
7.50011	974.852	18.2721	4.51705	0.24721
7.514	974.548	18.2775	4.51839	0.24721
7.52789	974.2	18.2843	4.52005	0.24721
7.54178	974.422	18.2797	4.51893	0.24721
7.55567	974.232	18.2833	4.51981	0.24721
7.56956	974.716	18.274	4.51752	0.24721
7.58344	975.008	18.269	4.51628	0.24721
7.59733	975.336	18.2631	4.51481	0.24721
7.61122	975.673	18.2559	4.51305	0.24721
7.62511	975.194	18.2648	4.51524	0.24721
7.639	974.8	18.2729	4.51725	0.24721
7.65289	975.197	18.2648	4.51525	0.24721
7.66678	975.696	18.256	4.51305	0.24721
7.68067	975.872	18.2521	4.5121	0.24721
7.69456	975.6	18.3631	4.51333	0.245782
7.70844	975.304	18.5938	4.51438	0.242789
7.72233	975.2	18.3777	4.51517	0.245687
7.73622	975	18.6003	4.51595	0.242789
7.75011	974.8	18.6037	4.51678	0.242789
7.764	974.25	18.6144	4.51938	0.242789
7.77789	974.576	18.6078	4.51778	0.242789
7.79178	974.8	18.6041	4.51687	0.242789
7.80567	974.8	18.4784	4.99663	0.270403
7.81956	974.434	18.4853	4.99848	0.270403
7.83344	974.311	18.4874	4.99906	0.270403
7.84733	974	18.6064	5.00059	0.268756
7.86122	974.182	18.8073	4.99939	0.265821
7.87511	974.2	18.4969	4.9997	0.2703
7.889	974.2	18.6029	4.99964	0.268756
7.90289	974.2	18.4898	4.99971	0.270403
7.91678	974.092	18.492	5.00031	0.270403
7.93067	975.154	18.4718	4.99484	0.270403
7.94456	975.184	18.4102	5.63434	0.306044
7.95844	975.4	18.3013	5.63346	0.307818
7.97233	975.332	18.3017	5.6336	0.307818
7.98622	975.515	18.2983	5.63254	0.307818
8.00011	975.452	18.2995	5.63294	0.307818
8.014	975.761	19.2789	5.62974	0.292015
8.02789	975.252	19.2896	5.63285	0.292015
8.04178	976.148	19.2718	5.62765	0.292015
8.05567	975.656	19.2814	5.63046	0.292015
8.06956	975.943	19.2758	5.62884	0.292015
8.08344	975.906	19.276	5.62888	0.292015
8.09733	976.271	19.226	5.79306	0.301314
8.11122	976.596	19.1389	6.10443	0.318954
8.12511	976.268	19.1444	6.10618	0.318954
8.139	977.2	19.1256	6.1002	0.318954
8.15289	976.6	19.1381	6.10419	0.318954
8.16678	976.572	19.1387	6.10437	0.318954
8.18067	976.6	19.7989	6.10318	0.308258
8.19456	976.372	19.4199	6.36054	0.327527
8.20844	976.228	19.7964	6.1161	0.308951
8.22233	976.6	19.799	6.10321	0.308258
8.23622	976.219	19.8067	6.10556	0.308258
8.25011	977	19.7901	6.10047	0.308258
8.264	976.738	19.7966	6.10247	0.308258
8.27789	977.4	19.7825	6.09812	0.308258
8.29178	977.068	19.7897	6.10035	0.308258
8.30567	976.845	19.7938	6.10159	0.308258
8.31956	976.888	20.011	6.10109	0.304886
8.33344	977.112	19.8022	6.09984	0.308038
8.34733	976.8	20.4552	6.10086	0.298255
8.36122	976.956	20.3677	6.42579	0.315489
8.37511	976.908	20.4523	6.1	0.298255
8.389	976.4	20.4633	6.1033	0.298255
8.40289	977.248	20.4056	6.25121	0.306347
8.41678	977.2	20.4457	6.10496	0.298594
8.43067	977.6	20.314	6.57455	0.323647
8.44456	977.339	20.3197	6.57641	0.323647
8.45844	977.351	20.319	6.5762	0.323647
8.47233	977.148	20.3241	6.57782	0.323647
8.48622	976.616	20.335	6.58137	0.323647
8.50011	977.058	20.3252	6.5782	0.323647
8.514	977.524	20.5329	6.57462	0.320199
8.52789	977.576	20.5321	6.57437	0.320199
8.54178	977.354	20.3329	6.57612	0.323422
8.55567	977.729	20.9717	6.57281	0.313414
8.56956	977.592	20.5318	6.57427	0.320199
8.58344	976.992	20.9864	6.57741	0.313414
8.59733	976.869	20.9898	6.5785	0.313414
8.61122	976.6	20.9954	6.58025	0.313414
8.62511	977.096	20.9849	6.57694	0.313414
8.639	977.572	20.9744	6.57367	0.313414
8.65289	977.4	20.978	6.5748	0.313414
8.66678	977.757	20.9706	6.57246	0.313414
8.68067	978.18	20.9618	6.56972	0.313414
8.69456	978.324	20.9581	6.56855	0.313414
8.70844	978.248	20.9608	6.56939	0.313414
8.72233	977.616	21.8554	6.98897	0.319782
8.73622	977.4	21.8029	7.21184	0.330774
8.75011	977.783	21.7936	7.20876	0.330774
8.764	977.068	21.8098	7.21411	0.330774
8.77789	976.864	21.8151	7.21587	0.330774
8.79178	977.066	21.8106	7.21438	0.330774
8.80567	977.029	19.2247	7.21865	0.375488
8.81956	975.8	21.8378	7.22338	0.330774
8.83344	976.244	21.8282	7.2202	0.330774
8.84733	976.2	21.8291	7.22049	0.330774
8.86122	976.2	21.8296	7.22067	0.330774
8.87511	976.395	21.8252	7.21923	0.330774
8.889	976.6	22.2557	7.2168	0.324267
8.90289	976.641	22.4799	7.21622	0.321008
8.91678	976.8	22.4766	7.21516	0.321008
8.93067	976.872	21.8147	7.21574	0.330774
8.94456	977.526	22.4594	7.20966	0.321008
8.95844	977.583	21.8127	7.21039	0.33056
8.97233	977.426	22.0336	7.21111	0.327279
8.98622	977.6	22.008	7.20969	0.327593
9.00011	977.416	22.339	7.68281	0.343919
9.014	977.232	22.3854	7.52487	0.33615
9.02789	977.916	21.8776	7.68627	0.351331
9.04178	977.6	22.4564	7.21564	0.321318
9.05567	977.937	22.3248	7.68485	0.344229
9.06956	977.618	22.3326	7.68755	0.344229
9.08344	978.2	22.3205	7.68336	0.344229
9.09733	978.397	22.3155	7.68166	0.344229
9.11122	978.4	22.3155	7.68163	0.344229
9.12511	978.242	22.3185	7.68268	0.344229
9.139	978.323	22.3169	7.68212	0.344229
9.15289	978.448	22.3144	7.68126	0.344229
9.16678	978	22.3244	7.6847	0.344229
9.18067	978.095	22.3223	7.68399	0.344229
9.19456	977.814	22.5394	7.6859	0.340998
9.20844	977.952	22.9837	7.68352	0.334303
9.22233	977.81	22.9885	7.68514	0.334303
9.23622	978.003	22.9845	7.68378	0.334303
9.25011	978.666	22.9675	7.67811	0.334303
9.264	978.534	22.971	7.67926	0.334303
9.27789	978.6	22.9696	7.67882	0.334303
9.29178	978.334	22.8121	8.31014	0.364287
9.30567	978.356	22.918	7.90188	0.344789
9.31956	979.088	23.1684	7.67462	0.331254
9.33344	978.495	23.4685	8.30794	0.354004
9.34733	977.925	23.4798	8.32123	0.354399
9.36122	977.492	23.4899	8.32479	0.354399
9.37511	977.805	23.4819	8.32196	0.354399
9.389	977.4	23.492	8.32553	0.354399
9.40289	977.2	23.4968	8.32723	0.354399
9.41678	977.128	23.4979	8.32764	0.354399
9.43067	976.821	22.8446	8.33129	0.364693
9.44456	977.106	23.4992	8.32808	0.354399
9.45844	977.4	23.4924	8.3257	0.354399
9.47233	977.704	23.4849	8.32302	0.354399
9.48622	977.749	23.4835	8.32252	0.354399
9.50011	977.4	23.4919	8.32549	0.354399
9.514	977.542	23.4889	8.32445	0.354399
9.52789	977.368	23.4931	8.32593	0.354399
9.54178	978.155	23.4737	8.31906	0.354399
9.55567	978.608	23.4631	8.31529	0.354399
9.56956	979.006	23.0189	8.77145	0.381054
9.58344	978.988	23.3123	8.80287	0.377607
9.59733	978.812	23.3341	8.79179	0.376778
9.61122	978.994	23.3297	8.79011	0.376778
9.62511	978.502	23.3418	8.79466	0.376778
9.639	978.6	23.3388	8.79356	0.376778
9.65289	978.336	23.5696	8.79554	0.373173
9.66678	978.009	23.3536	8.79914	0.376778
9.68067	977.6	23.3633	8.80278	0.376778
9.69456	978.658	23.3378	8.79317	0.376778
9.70844	978.823	23.9854	8.79036	0.366487
9.72233	978.899	23.9913	8.78993	0.36638
9.73622	978.8	23.993	8.79055	0.36638
9.75011	978.8	23.9932	8.79064	0.36638
9.764	978.6	23.9983	8.79248	0.36638
9.77789	979.2	23.9833	8.78701	0.36638
9.79178	979.132	23.9849	8.78757	0.36638
9.80567	979.6	23.8082	9.42059	0.395686
9.81956	979.275	23.9815	8.78633	0.36638
9.83344	979.356	23.8171	9.41474	0.395294
9.84733	979.4	23.8136	9.4227	0.395686
9.86122	979.2	23.8176	9.42429	0.395686
9.87511	979.342	23.8152	9.42335	0.395686
9.889	979.346	23.8148	9.42317	0.395686
9.90289	979.6	24.1236	9.42002	0.390491
9.91678	979.246	24.8039	9.42179	0.37985
9.93067	979.424	24.8003	9.42041	0.37985
9.94456	979.491	24.7985	9.41972	0.37985
9.95844	979.2	24.8051	9.42223	0.37985
9.97233	978.6	24.8206	9.4281	0.37985
9.98622	978.4	25.4847	9.4288	0.369979
10.0001	978.449	25.1618	9.42924	0.374745
10.014	978.326	25.3741	9.42961	0.371623
10.0279	978.123	25.491	9.43114	0.369979
10.0418	978.064	25.4941	9.43227	0.369979
10.0557	978.544	25.3693	9.42779	0.371623
10.0696	978.03	25.4936	9.43208	0.369979
10.0834	978.727	25.4766	9.42579	0.369979
10.0973	979.204	26.1221	9.41978	0.360606
10.1112	978.976	26.1276	9.42179	0.360606
10.1251	979.385	26.1171	9.41799	0.360606
10.139	979.802	26.1062	9.41408	0.360606
10.1529	979.748	26.1078	9.41464	0.360606
10.1668	979.404	25.9948	9.88947	0.38044
10.1807	980	26.0569	9.57732	0.367555
10.1946	980.457	26.298	9.40716	0.357714
10.2084	980.957	26.7322	9.40162	0.351697
10.2223	980.8	26.7359	9.40294	0.351697
10.2362	981.104	26.7279	9.40012	0.351697
10.2501	980.986	26.6095	9.87205	0.370997
10.264	980.4	27.0572	9.8834	0.365278
10.2779	980.8	26.8229	9.87996	0.36834
10.2918	980.468	27.2784	9.88204	0.362265
10.3057	981.132	26.6038	9.87687	0.371258
10.3196	981.267	27.2564	9.87404	0.362265
10.3334	981.4	27.2527	9.8727	0.362265
10.3473	981.437	27.0283	9.87281	0.365278
10.3612	981.429	27.0422	9.87276	0.365088
10.3751	981.304	26.5998	9.87539	0.371258
10.389	981.016	26.4421	10.5142	0.397631
10.4029	981.375	26.4326	10.5104	0.397631
10.4168	981.837	26.4203	10.5055	0.397631
10.4307	982.2	26.4105	10.5016	0.397631
10.4446	982.072	26.6229	10.5024	0.394486
10.4584	982.128	26.4201	10.5027	0.397525
10.4723	982.179	27.067	10.5004	0.38794
10.4862	981.894	27.0748	10.5034	0.38794
10.5001	981.348	27.0903	10.5094	0.38794
10.514	981.417	27.0884	10.5087	0.38794
10.5279	981.374	27.0892	10.509	0.38794
10.5418	981.351	27.0897	10.5092	0.38794
10.5557	980.948	27.7571	10.5119	0.37871
10.5696	981.168	27.7518	10.5099	0.37871
10.5834	980.891	27.7586	10.5124	0.37871
10.5973	980.916	27.758	10.5122	0.37871
10.6112	980.404	27.7725	10.5177	0.37871
10.6251	980.463	27.6494	10.9883	0.397416
10.639	980.194	27.6549	10.9975	0.397669
10.6529	979.494	27.6758	11.0058	0.397669
10.6668	979.857	27.6646	11.0013	0.397669
10.6807	980.392	27.6499	10.9955	0.397669
10.6946	980.685	27.6419	10.9923	0.397669
10.7084	980.975	27.6341	10.9892	0.397669
10.7223	981.2	27.6281	10.9868	0.397669
10.7362	981.324	27.6242	10.9853	0.397669
10.7501	981.6	27.616	10.982	0.397669
10.764	981.952	27.6064	10.9782	0.397669
10.7779	981.4	28.2777	10.9826	0.388386
10.7918	981.468	28.2757	10.9819	0.388386
10.8057	981.332	28.28	10.9836	0.388386
10.8196	981.72	28.2692	10.9793	0.388386
10.8334	981.644	28.2709	10.98	0.388386
10.8473	982.424	28.2483	10.9713	0.388386
10.8612	982.688	28.2016	11.1208	0.394334
10.8751	982.053	28.1363	11.4523	0.407029
10.889	982.4	28.126	11.4481	0.407029
10.9029	982.2	28.1321	11.4506	0.407029
10.9168	982.492	28.1247	11.4476	0.407029
10.9307	982.687	28.1182	11.4449	0.407029
10.9446	983.264	28.1014	11.4381	0.407029
10.9584	982.933	28.1104	11.4418	0.407029
10.9723	982.833	28.546	11.4421	0.40083
10.9862	982.8	28.993	11.4414	0.394626
11.0001	982.775	28.771	11.4423	0.397704
11.014	982.652	28.8854	11.4432	0.396159
11.0279	983.6	28.7466	11.4326	0.397704
11.0418	983.4	28.7527	11.4351	0.397704
11.0557	983	28.8763	11.4396	0.396159
11.0696	983.632	28.6353	11.8642	0.414322
11.0834	983.29	28.5943	12.0628	0.42186
11.0973	983.403	28.5891	12.07	0.42219
11.1112	983.689	29.236	12.0651	0.412679
11.1251	983.8	29.2324	12.0636	0.412679
11.139	983.8	29.2325	12.0637	0.412679
11.1529	983.604	29.2372	12.0656	0.412679
11.1668	983.186	29.2489	12.0704	0.412679
11.1807	982.916	29.2581	12.0742	0.412679
11.1946	982.514	29.5839	12.0784	0.408277
11.2084	981.828	29.3036	12.0872	0.412482
11.2223	982.372	30.2573	12.0784	0.39919
11.2362	981.648	30.2791	12.0871	0.39919
11.2501	981.6	30.2811	12.0879	0.39919
11.264	981.909	29.2888	12.0869	0.412679
11.2779	982.107	29.5564	12.2358	0.413983
11.2918	982.444	30.2534	12.0839	0.399421
11.3057	982.966	30.1158	12.5473	0.416634
11.3196	982.344	30.1347	12.5551	0.416634
11.3334	983.224	30.1089	12.5444	0.416634
11.3473	983.044	30.1137	12.5464	0.416634
11.3612	982.547	30.1291	12.5528	0.416634
11.3751	982.669	30.1261	12.5516	0.416634
11.389	983.2	30.3253	12.544	0.413649
11.4029	983.2	30.4374	12.544	0.412125
11.4168	983.374	30.4307	12.5413	0.412125
11.4307	983.325	30.4333	12.5423	0.412125
11.4446	983.214	30.4355	12.5432	0.412125
11.4584	983.484	30.4273	12.5399	0.412125
11.4723	983.6	30.4242	12.5386	0.412125
11.4862	983.389	30.3197	12.9731	0.427876
11.5001	983.589	30.2632	13.1651	0.435019
11.514	983.544	30.2621	13.174	0.435331
11.5279	983.768	30.2549	13.1709	0.435331
11.5418	984.012	31.2148	13.1651	0.421757
11.5557	984.2	31.2231	13.1626	0.421568
11.5696	984	31.2296	13.1654	0.421568
11.5834	984.073	31.2268	13.1642	0.421568
11.5973	984.163	31.2239	13.163	0.421568
11.6112	984.2	31.2224	13.1624	0.421568
11.6251	984.2	31.2227	13.1625	0.421568
11.639	984.982	31.1984	13.1523	0.421568
11.6529	985.028	31.1973	13.1518	0.421568
11.6668	984.544	31.2126	13.1582	0.421568
11.6807	984.347	32.1571	13.3231	0.414314
11.6946	984.476	32.072	13.6318	0.425037
11.7084	984.576	32.0701	13.631	0.425037
11.7223	984.848	32.0599	13.6267	0.425037
11.7362	984.485	32.0726	13.632	0.425037
11.7501	984.2	32.0804	13.6354	0.425037
11.764	984	32.4144	13.6375	0.420722
11.7779	984.068	32.4122	13.6365	0.420722
11.7918	983.888	32.4178	13.6389	0.420722
11.8057	983.488	32.4302	13.6441	0.420722
11.8196	983.756	32.4233	13.6412	0.420722
11.8334	983.576	32.4289	13.6436	0.420722
11.8473	982.335	33.1105	13.6589	0.412524
11.8612	982.4	33.4494	13.6569	0.408287
11.8751	982.554	33.2831	14.2817	0.429099
11.889	982.346	33.2879	14.2933	0.429383
11.9029	982.391	33.2866	14.2927	0.429383
11.9168	982.266	33.2908	14.2945	0.429383
11.9307	982.852	33.271	14.286	0.429383
11.9446	982.052	33.2981	14.2976	0.429383
11.9584	983.4	33.2526	14.2781	0.429383
11.9723	983.546	33.2478	14.276	0.429383
11.9862	983.632	33.2446	14.2747	0.429383
12.0001	983.64	33.2452	14.2749	0.429383
12.014	984.536	33.2144	14.2617	0.429383
12.0279	984.024	33.2317	14.2691	0.429383
12.0418	984.412	33.2183	14.2633	0.429383
12.0557	984.2	33.7564	14.7402	0.436665
12.0696	984.2	33.7576	14.7408	0.436665
12.0834	984.2	33.7583	14.741	0.436665
12.0973	984.192	33.7562	14.7401	0.436665
12.1112	984.644	33.7417	14.7338	0.436665
12.1251	984.404	33.7493	14.7371	0.436665
12.139	984.2	33.7574	14.7407	0.436665
12.1529	984.386	33.7505	14.7377	0.436665
12.1668	984.572	33.7437	14.7347	0.436665
12.1807	984.954	34.3834	14.727	0.428316
12.1946	984.632	34.6179	14.7315	0.425546
12.2084	984.328	34.4051	14.7362	0.428316
12.2223	984.6	34.2339	15.3669	0.448881
12.2362	985	34.2203	15.3608	0.448881
12.2501	984.421	34.2392	15.3693	0.448881
12.264	985	34.8718	15.3582	0.440419
12.2779	985.2	34.8656	15.3555	0.440419
12.2918	984.6	34.887	15.3649	0.440419
12.3057	984.268	34.8981	15.3698	0.440419
12.3196	983.846	34.9134	15.3765	0.440419
12.3334	983.877	34.9125	15.3761	0.440419
12.3473	983.6	35.5614	15.3782	0.432441
12.3612	983.636	35.901	15.3767	0.428308
12.3751	983.76	35.8969	15.3749	0.428308
12.389	983.4	35.83	15.6916	0.437944
12.4029	983.564	35.7813	15.8539	0.443077
12.4168	983.6	35.7812	15.8538	0.443077
12.4307	983.452	35.7848	15.8554	0.443077
12.4446	984.378	35.752	15.8409	0.443077
12.4584	983.949	35.7687	15.8483	0.443077
12.4723	983.948	35.7677	15.8478	0.443077
12.4862	983.841	36.0983	15.8486	0.439039
12.5001	983.816	36.1002	15.8494	0.439039
12.514	984.208	36.0838	15.8422	0.439039
12.5279	984.615	36.0696	15.836	0.439039
12.5418	984.406	36.0771	15.8392	0.439039
12.5557	984.694	35.9055	16.4696	0.458692
12.5696	984	35.9301	16.4809	0.458692
12.5834	984.2	35.9239	16.478	0.458692
12.5973	984.6	36.5465	16.4684	0.450615
12.6112	984.6	36.888	16.4678	0.446428
12.6251	985.592	36.8499	16.4509	0.446428
12.639	985.4	36.8573	16.4541	0.446428
12.6529	985.243	36.8632	16.4568	0.446428
12.6668	985.228	36.8634	16.4568	0.446428
12.6807	985	36.7941	16.7721	0.455837
12.6946	985.2	36.8254	16.6094	0.451031
12.7084	985.4	37.3805	16.9272	0.452836
12.7223	985.37	37.389	16.9279	0.452751
12.7362	985.276	37.3927	16.9296	0.452751
12.7501	985.224	35.8627	17.8732	0.498379
12.764	985.264	37.3917	16.9291	0.452751
12.7779	985.532	37.3828	16.9251	0.452751
12.7918	985.8	37.3719	16.9202	0.452751
12.8057	986.28	37.6807	16.9114	0.448808
12.8196	986	37.6903	16.9157	0.448808
12.8334	986	37.6912	16.9161	0.448808
12.8473	986.058	37.5527	17.4448	0.464542
12.8612	986.108	37.5379	17.497	0.466116
12.8751	985.483	37.5886	17.4	0.462907
12.889	985.769	38.555	17.3914	0.451082
12.9029	986	38.5465	17.3876	0.451082
12.9168	984.8	38.5538	17.5653	0.455606
12.9307	984.8	38.5789	17.4635	0.452671
12.9446	984.728	38.805	17.4096	0.448643
12.9584	984.05	39.2358	17.5764	0.447969
12.9723	984.217	39.2278	17.5752	0.44803
12.9862	984.074	39.164	17.8508	0.455796
13.0001	984	39.1168	18.0466	0.461352
13.014	984.008	39.1141	18.0548	0.461593
13.0279	984.2	39.108	18.052	0.461593
13.0418	984	39.1154	18.0554	0.461593
13.0557	984.103	39.1121	18.0539	0.461593
13.0696	984.194	39.1083	18.0521	0.461593
13.0834	984.103	39.1127	18.0541	0.461593
13.0973	984.612	39.742	18.0412	0.453959
13.1112	984.621	39.7419	18.0412	0.453959
13.1251	984.732	39.6211	18.5102	0.467182
13.139	984.736	39.825	18.5146	0.464899
13.1529	984.504	39.6259	18.5196	0.46736
13.1668	984.772	39.6155	18.5147	0.46736
13.1807	985.193	40.0215	18.5052	0.462382
13.1946	985.783	40.227	18.4936	0.459732
13.2084	985.6	40.2344	18.4971	0.459732
13.2223	985.4	40.242	18.5006	0.459732
13.2362	985.4	40.242	18.5006	0.459732
13.2501	985.314	40.2459	18.5024	0.459732
13.264	985.224	41.0659	19.1347	0.465952
13.2779	985.6	41.0502	19.1274	0.465952
13.2918	985.6	41.0506	19.1276	0.465952
13.3057	985.6	41.052	19.1283	0.465952
13.3196	985.244	41.0632	19.1335	0.465952
13.3334	985.6	41.0498	19.1272	0.465952
13.3473	985.6	41.0488	19.1268	0.465952
13.3612	985.8	41.3668	19.122	0.462255
13.3751	985.781	41.3661	19.1217	0.462255
13.389	986.292	41.267	19.4228	0.470663
13.4029	985.4	41.2624	19.6053	0.475138
13.4168	986.744	42.1675	19.5746	0.464211
13.4307	986.257	42.2032	19.5847	0.464057
13.4446	985.8	42.2223	19.5936	0.464057
13.4584	985.8	42.0629	20.2189	0.480683
13.4723	985.8	42.2221	19.5935	0.464057
13.4862	985.968	42.1052	20.0211	0.475502
13.5001	985.296	42.2442	19.6037	0.464057
13.514	985.788	42.984	19.5906	0.455765
13.5279	984.8	42.8647	19.8138	0.46224
13.5418	984.6	42.7629	20.2489	0.473517
13.5557	984.6	42.8755	20.2493	0.472281
13.5696	984.352	42.7743	20.2543	0.473517
13.5834	984.445	42.6535	20.7235	0.485858
13.5973	985.07	42.6237	20.7162	0.486025
13.6112	985.2	42.8396	20.7124	0.483488
13.6251	984.914	43.3864	20.2469	0.466664
13.639	984.972	43.3991	20.2392	0.466349
13.6529	985.552	43.3347	20.3793	0.470277
13.6668	985.706	43.2478	20.7004	0.478647
13.6807	985.8	43.8775	20.6944	0.47164
13.6946	986.112	44.2039	20.687	0.467991
13.7084	985.868	44.2144	20.6919	0.467991
13.7223	985.914	44.2139	20.6917	0.467991
13.7362	986	44.0466	21.3225	0.48409
13.7501	986.312	44.0331	21.316	0.48409
13.764	985.969	44.05	21.3241	0.48409
13.7779	985.87	44.0542	21.3262	0.48409
13.7918	985.984	44.6853	21.3208	0.477132
13.8057	986.356	44.6829	21.313	0.476983
13.8196	986.266	44.6868	21.3148	0.476983
13.8334	986.236	44.6879	21.3154	0.476983
13.8473	986.618	45.3219	21.305	0.470082
13.8612	986.872	45.2719	21.4516	0.47384
13.8751	986.935	45.1851	21.7723	0.481846
13.889	987.252	45.1713	21.7656	0.481846
13.9029	987.348	45.816	21.7605	0.474955
13.9168	986.6	45.8505	21.7769	0.474955
13.9307	986.815	45.7348	22.1856	0.485092
13.9446	987.096	45.6673	22.3994	0.49049
13.9584	986.811	45.6814	22.4063	0.49049
13.9723	987.144	45.5453	22.8736	0.502216
13.9862	987.354	45.536	22.8689	0.502216
14.0001	987.564	45.5266	22.8642	0.502216
14.014	987.224	45.5409	22.8714	0.502216
14.0279	987.388	45.5324	22.8671	0.502216
14.0418	987.2	45.5431	22.8725	0.502216
14.0557	987.607	45.4191	23.2766	0.512484
14.0696	987.504	46.2309	23.4941	0.50819
14.0834	986.608	46.5357	22.8901	0.491882
14.0973	987.496	46.8268	22.8592	0.488164
14.1112	987.503	47.0871	23.0608	0.489747
14.1251	987.256	47.6451	23.4936	0.493097
14.139	987.186	47.6475	23.4948	0.493097
14.1529	986.656	47.6738	23.5078	0.493097
14.1668	986.2	47.6971	23.5193	0.493097
14.1807	986.2	48.3458	23.5158	0.486407
14.1946	986.2	48.5588	23.5142	0.484241
14.2084	986.2	48.9981	23.514	0.479897
14.2223	986.2	48.7341	23.6793	0.485887
14.2362	986.2	48.9944	23.5123	0.479897
14.2501	986.366	48.8678	23.9773	0.490658
14.264	986.6	48.857	23.9792	0.490803
14.2779	987.312	48.8215	23.9617	0.490803
14.2918	987.288	48.8198	23.9609	0.490803
14.3057	987.57	49.4566	23.952	0.484304
14.3196	987.305	49.3496	24.4332	0.495104
14.3334	987.041	49.3633	24.44	0.495104
14.3473	986.8	49.3749	24.4457	0.495104
14.3612	986.8	48.4973	24.4497	0.504146
14.3751	986.944	50.3338	24.4373	0.485505
14.389	987.469	50.1068	24.4252	0.487462
14.4029	987.8	50.0349	25.05	0.500651
14.4168	988.2	50.1175	25.0391	0.499607
14.4307	988	50.1284	25.0445	0.499607
14.4446	987.8	50.0179	25.524	0.510297
14.4584	987.8	50.0164	25.5232	0.510297
14.4723	987.8	49.9082	25.5249	0.511436
14.4862	988.016	50.0077	25.5188	0.510297
14.5001	988.2	49.9976	25.5136	0.510297
14.514	988.2	49.9976	25.5136	0.510297
14.5279	988.2	50.1015	25.5134	0.509233
14.5418	988.118	50.1695	26.1392	0.521019
14.5557	987.92	50.1764	26.1524	0.52121
14.5696	988	50.3782	26.1487	0.519048
14.5834	988.098	50.8132	26.1432	0.514496
14.5973	988.331	50.8035	26.1382	0.514496
14.6112	988.629	51.7599	26.1254	0.504743
14.6251	988.795	51.751	26.1209	0.504743
14.639	988.572	52.4104	26.1236	0.498443
14.6529	988.648	52.6127	26.1204	0.496466
14.6668	988.451	53.0629	26.1228	0.492299
14.6807	988.6	53.0157	26.2844	0.495785
14.6946	988.348	52.9513	26.6011	0.50237
14.7084	988.083	53.6067	26.6052	0.496303
14.7223	987.818	53.6256	26.6111	0.496239
14.7362	987.489	53.5917	26.8222	0.500491
14.7501	987.2	53.6581	26.6367	0.496415
14.764	987.734	54.1196	27.2435	0.503394
14.7779	987.112	54.1546	27.2611	0.503394
14.7918	987.8	52.8403	27.2481	0.515669
14.8057	987.4	54.1379	27.2527	0.503394
14.8196	987.227	54.0281	27.7327	0.513301
14.8334	987.308	54.0253	27.7313	0.513301
14.8473	987.4	54.0181	27.7276	0.513301
14.8612	987.672	54.9759	27.7152	0.504134
14.8751	988.149	54.9493	27.7018	0.504134
14.889	988.328	54.834	28.1094	0.512628
14.9029	987.941	54.9109	27.9106	0.508289
14.9168	987.644	54.8183	28.3492	0.517149
14.9307	987.704	55.4628	28.3441	0.511046
14.9446	988.2	55.4347	28.3297	0.511046
14.9584	988.371	55.4232	28.3238	0.511046
14.9723	988.246	55.7801	28.6356	0.513365
14.9862	988.4	55.951	28.7948	0.514642
15.0001	988.416	55.951	28.7947	0.514642
15.014	989.458	55.8929	28.7648	0.514642
15.0279	989.594	56.0917	28.7599	0.512729
15.0418	989.224	56.5516	28.7676	0.508695
15.0557	988.964	56.4078	29.4076	0.521339
15.0696	988.808	56.4148	29.4112	0.521339
15.0834	989.132	57.0364	29.3982	0.515429
15.0973	989	57.0546	29.404	0.515366
15.1112	988.721	57.0318	29.5637	0.518373
15.1251	988.214	56.9777	29.9005	0.524776
15.139	988.972	57.5819	29.8745	0.518818
15.1529	988.924	57.585	29.8761	0.518818
15.1668	989.753	57.5382	29.8519	0.518818
15.1807	989.6	57.467	30.165	0.52491
15.1946	989.362	58.4096	30.3314	0.519288
15.2084	989.728	58.3875	30.3199	0.519288
15.2223	989.482	58.1285	30.5486	0.525537
15.2362	989.244	58.4166	30.335	0.519288
15.2501	989.577	58.7127	30.3228	0.516461
15.264	989.666	58.5563	30.9524	0.528592
15.2779	989.789	58.5493	30.9487	0.528592
15.2918	989.728	59.5074	30.9447	0.520014
15.3057	989.339	59.2067	30.9582	0.522883
15.3196	989.167	59.5546	30.962	0.519893
15.3334	989.738	59.4043	31.4126	0.528792
15.3473	989.692	59.8239	31.4174	0.525166
15.3612	989.8	60.0454	31.4134	0.523161
15.3751	989.8	60.0451	31.4132	0.523161
15.389	989.728	59.9936	31.6342	0.527292
15.4029	990.104	60.5136	32.0315	0.529326
15.4168	990.113	60.5131	32.0312	0.529326
15.4307	989.974	60.521	32.0353	0.529326
15.4446	989.61	61.1896	32.0436	0.523677
15.4584	989.776	61.1778	32.0374	0.523677
15.4723	989.339	61.0863	32.5259	0.532458
15.4862	989.684	61.3752	32.5133	0.529746
15.5001	989.475	62.0491	32.5169	0.524052
15.514	989.663	62.0351	32.5096	0.524052
15.5279	989.471	61.9939	33.1486	0.534707
15.5418	989.294	62.2235	33.1524	0.532796
15.5557	989.464	62.2116	33.1461	0.532796
15.5696	989.6	63.171	33.1354	0.524536
15.5834	990	63.1442	33.1214	0.524536
15.5973	990.109	63.0225	33.5936	0.533041
15.6112	990.2	63.2228	33.5893	0.531285
15.6251	989.766	63.689	33.6009	0.527577
15.639	989.676	63.6935	33.6032	0.527577
15.6529	989.6	63.7473	34.2373	0.537078
15.6668	989.861	64.1692	34.2252	0.533358
15.6807	990.2	64.1492	34.2145	0.533358
15.6946	990.428	64.3375	34.2039	0.531632
15.7084	989.934	64.6933	34.6866	0.53617
15.7223	989.868	64.6976	34.6961	0.53628
15.7362	989.864	64.6969	34.6957	0.53628
15.7501	990.4	65.6138	34.6701	0.528397
15.764	990.512	65.5181	35.0792	0.535413
15.7779	990	65.4976	35.3167	0.539206
15.7918	990.112	65.8068	35.3112	0.53659
15.8057	990.108	65.8126	35.3106	0.536533
15.8196	989.908	66.135	35.316	0.533998
15.8334	989.8	66.6884	35.7856	0.53661
15.8473	989.542	66.6992	35.7986	0.536717
15.8612	989.8	66.8868	35.7875	0.535046
15.8751	989.8	67.3237	35.7835	0.531514
15.889	989.8	67.1702	36.4179	0.542173
15.9029	988.786	67.4439	36.4532	0.540497
15.9168	986.696	68.0267	36.5273	0.536955
15.9307	985.474	68.456	36.8821	0.538771
15.9446	985.526	68.6352	37.0419	0.539693
15.9584	987.274	69.4701	36.9705	0.532178
15.9723	988.292	69.4129	36.9326	0.532071
15.9862	989.069	69.3077	37.1058	0.535379
16.0001	989.832	69.4617	37.5045	0.539931
16.014	989.988	69.4593	37.4995	0.539877
16.0279	989.988	69.4579	37.4987	0.539877
16.0418	989.4	69.3863	37.991	0.547529
16.0557	989.638	69.3667	37.9875	0.547633
16.0696	989.8	69.9978	37.9758	0.542528
16.0834	989.8	69.998	37.9829	0.542628
16.0973	989.967	69.8305	38.6026	0.552804
16.1112	990.2	70.7819	38.5876	0.545162
16.1251	990.315	70.7744	38.5835	0.545162
16.139	990.786	70.7372	38.5633	0.545162
16.1529	991.368	70.8649	38.6915	0.54599
16.1668	990.496	71.2857	39.0449	0.547724
16.1807	990.876	71.6755	39.0268	0.544492
16.1946	991	71.7394	39.654	0.552751
16.2084	990.734	71.7547	39.6625	0.552751
16.2223	990.4	71.78	39.6764	0.552751
16.2362	990.4	72.422	39.6709	0.547774
16.2501	991.088	72.3707	39.6428	0.547774
16.264	990.595	72.709	40.1347	0.551991
16.2779	990.27	72.9575	40.1455	0.550259
16.2918	990.901	72.7579	40.7442	0.559996
16.3057	991.078	73.707	40.738	0.552701
16.3196	990.8	73.6119	41.2242	0.560021
16.3334	990.824	73.609	41.2226	0.560021
16.3473	991	73.5974	41.2161	0.560021
16.3612	991.072	73.5935	41.2139	0.560021
16.3751	991.6	73.8667	41.1884	0.557605
16.389	991.652	74.4962	41.1802	0.552782
16.4029	991.6	74.8347	41.1797	0.550275
16.4168	991.632	75.3108	41.7988	0.555017
16.4307	991.239	75.3519	41.8235	0.555042
16.4446	991	75.9667	41.9794	0.552603
16.4584	991.6	75.8435	42.2774	0.557429
16.4723	991.612	75.8407	42.2758	0.557429
16.4862	992.341	75.6688	42.7186	0.564547
16.5001	992.998	75.618	42.6899	0.564547
16.514	992.834	76.173	43.1058	0.565893
16.5279	992.603	76.2915	42.7029	0.559733
16.5418	992.8	77.2331	42.6878	0.552713
16.5557	993	77.0664	43.3085	0.561964
16.5696	992.6	77.6353	43.321	0.558007
16.5834	992.6	77.4132	43.3207	0.559603
16.5973	993.372	77.8766	43.7583	0.561893
16.6112	993.137	78.2209	43.7653	0.559509
16.6251	993.026	78.228	43.7693	0.559509
16.639	992.916	78.7264	44.4022	0.564006
16.6529	992.805	78.7324	44.4056	0.564006
16.6668	992.6	79.3809	44.4084	0.559435
16.6807	992.722	79.2642	44.8777	0.566179
16.6946	992.534	79.4845	44.8849	0.564701
16.7084	992.504	79.9234	44.8827	0.561572
16.7223	992.914	79.7339	45.4945	0.570579
16.7362	993.136	79.6016	45.9587	0.577359
16.7501	993.4	79.5812	45.9469	0.577359
16.764	993.461	79.5213	46.1621	0.5805
16.7779	994.086	80.0609	46.3385	0.57879
16.7918	993.664	80.0528	46.5548	0.581551
16.8057	993.4	80.9757	45.9339	0.567255
16.8196	993	81.0462	46.5831	0.574772
16.8334	994.326	81.591	46.5151	0.570101
16.8473	994.246	81.9043	46.9885	0.5737
16.8612	994.101	82.1326	46.9927	0.572156
16.8751	993.881	82.1475	47.0012	0.572156
16.889	993.6	82.7164	47.425	0.573344
16.9029	993.4	82.6761	47.6513	0.576362
16.9168	994.148	83.2346	47.611	0.57201
16.9307	994.188	83.2488	47.6072	0.571867
16.9446	994.026	84.107	48.0802	0.571656
16.9584	994.151	84.0943	48.073	0.571656
16.9723	994.396	84.1339	48.6919	0.578743
16.9862	994.731	84.2151	48.6749	0.577984
17.0001	994.2	84.2567	48.699	0.577984
17.014	994.2	84.7674	49.1668	0.58002
17.0279	994.686	85.0128	49.3432	0.580421
17.0418	994.6	85.5464	49.7698	0.581788
17.0557	994.74	85.5398	49.762	0.581741
17.0696	994.8	85.6236	50.2303	0.586641
17.0834	995.31	86.0154	50.2011	0.58363
17.0973	996.092	85.8463	50.5724	0.589104
17.1112	996.23	86.4353	50.7298	0.586911
17.1251	996	86.4436	50.7899	0.587549
17.139	996	86.9481	51.2561	0.589502
17.1529	995.6	87.2796	51.4252	0.589201
17.1668	995.6	87.3173	51.2817	0.587303
17.1807	996	87.5246	51.5588	0.589077
17.1946	995.432	87.8409	51.7497	0.58913
17.2084	996	88.2911	52.3359	0.592765
17.2223	995.822	88.2766	52.3368	0.592872
17.2362	995.8	88.9093	52.5004	0.590494
17.2501	995.783	88.8317	52.8226	0.594637
17.264	995.595	89.4844	52.8253	0.590329
17.2779	995.211	89.4684	53.0466	0.592909
17.2918	995.4	89.9852	53.4627	0.594128
17.3057	995.96	89.9364	53.4297	0.594083
17.3196	995.308	90.0854	53.9366	0.598728
17.3334	995.949	90.4357	53.8823	0.595808
17.3473	995.355	90.4138	54.3408	0.601023
17.3612	995.484	90.9882	54.5472	0.599498
17.3751	995.8	91.9001	54.5195	0.593248
17.389	996.196	91.8041	54.8073	0.597003
17.4029	995.94	91.9919	54.9834	0.597698
17.4168	995.828	92.432	54.9828	0.594845
17.4307	996.372	92.2848	55.366	0.599947
17.4446	996.4	92.8243	55.7246	0.600323
17.4584	996.868	92.7075	56.0229	0.604297
17.4723	997.213	93.3148	55.9989	0.600107
17.4862	996.349	93.5508	56.2468	0.601243
17.5001	996.6	93.853	56.6544	0.603651
17.514	996.8	93.8327	56.6422	0.603651
17.5279	996.8	94.3592	57.1109	0.60525
17.5418	996.997	94.3429	57.101	0.60525
17.5557	996.676	95.2229	57.5177	0.604033
17.5696	996.2	95.3193	57.7637	0.606002
17.5834	996.912	95.4652	57.7186	0.604603
17.5973	996.853	95.3584	58.1957	0.610284
17.6112	996.8	96.3201	58.1902	0.604133
17.6251	996.8	96.94	58.1821	0.600186
17.639	996.8	96.802	58.8125	0.607555
17.6529	996.967	97.3824	58.9451	0.605295
17.6668	997.163	97.2922	59.2585	0.609077
17.6807	997.744	97.7933	59.5241	0.608672
17.6946	998.6	97.8723	59.634	0.609304
17.7084	997.838	98.3761	59.6728	0.606578
17.7223	997.423	98.7334	60.1064	0.608775
17.7362	997.448	99.0047	60.3213	0.609276
17.7501	997.554	98.888	60.313	0.609912
17.764	997.2	99.7658	60.798	0.609407
17.7779	997.348	99.9531	60.7863	0.608149
17.7918	997.064	100.412	60.7977	0.605482
17.8057	997.965	100.807	61.367	0.608756
17.8196	997.801	100.746	61.6975	0.612408
17.8334	998.248	101.287	61.808	0.610224
17.8473	997.6	102.094	61.8459	0.605777
17.8612	998.058	102.119	62.4444	0.611489
17.8751	998.071	102.738	62.4365	0.607725
17.889	998.134	102.976	62.7385	0.609254
17.9029	997.89	103.283	62.9118	0.609122
17.9168	997.612	103.166	63.5529	0.616025
17.9307	997.903	103.764	63.5332	0.612286
17.9446	999.192	104.23	63.596	0.610153
17.9584	998.625	104.209	63.951	0.613681
17.9723	998.823	104.729	64.3452	0.614399
17.9862	998.276	105.679	64.5843	0.611139
18.0001	998.4	105.67	64.5792	0.611139
18.014	998.051	105.994	65.0708	0.61391
18.0279	998.272	106.408	65.0506	0.611334
18.0418	998.245	106.689	65.6655	0.615485
18.0557	998.392	107.091	65.6604	0.613126
18.0696	998.628	107.584	65.6384	0.610112
18.0834	998.788	108.107	66.0887	0.611326
18.0973	998.251	107.957	66.1305	0.612563
18.1112	998.616	108.026	66.9853	0.620083
18.1251	998.757	108.777	67.1892	0.617678
18.139	998.957	108.771	67.1721	0.617553
18.1529	999.61	109.601	67.3182	0.61421
18.1668	999.578	110.127	67.7397	0.615106
18.1807	998.6	110.169	68.1146	0.618276
18.1946	998.6	110.764	68.2714	0.616366
18.2084	998.6	111.7	68.2599	0.6111
18.2223	998.8	111.59	68.6555	0.615251
18.2362	998.6	111.868	68.9289	0.616161
18.2501	999.335	112.512	69.7626	0.620044
18.264	999	112.559	69.7898	0.62003
18.2779	999.4	112.716	69.7599	0.618898
18.2918	999.532	112.987	70.3683	0.622799
18.3057	999.6	113.754	69.7317	0.613002
18.3196	999.344	113.835	70.3761	0.618228
18.3334	999.712	114.114	70.8111	0.620527
18.3473	999.6	115.071	70.8121	0.615378
18.3612	999.621	115.123	71.0115	0.616833
18.3751	999.852	115.209	71.4195	0.61991
18.389	1000.08	116.13	71.3909	0.614751
18.4029	1000.34	116.693	71.5144	0.612842
18.4168	1000.56	116.442	72.4372	0.622091
18.4307	1000.84	117.041	72.4195	0.618755
18.4446	1000.93	117.585	72.725	0.618491
18.4584	1000.05	117.653	72.9332	0.619901
18.4723	999.296	118.618	73.2928	0.61789
18.4862	998.813	118.805	74.119	0.623868
18.5001	998.073	119.719	74.6284	0.623364
18.514	997.536	119.644	75.3039	0.629401
18.5279	997.464	120.431	74.6682	0.620007
18.5418	997.8	121.016	74.6349	0.616735
18.5557	997.284	121.622	75.0781	0.617306
18.5696	997.394	122.502	75.274	0.614472
18.5834	997.388	122.39	75.7391	0.618836
18.5973	997.204	123.251	76.1612	0.617933
18.6112	997	123.656	75.9622	0.614304
18.6251	996.4	124.246	76.4274	0.615128
18.639	996.596	124.76	76.8796	0.616219
18.6529	996.996	124.789	77.3699	0.620006
18.6668	997.592	125.153	77.2675	0.617384
18.6807	998.373	125.893	77.6592	0.616865
18.6946	998.428	125.948	77.8169	0.617849
18.7084	998.2	127.121	77.8168	0.612146
18.7223	998	127.052	78.3071	0.616338
18.7362	998.2	127.511	78.9135	0.618875
18.7501	998.101	127.723	79.384	0.621532
18.764	997.819	128.378	79.4015	0.618496
18.7779	998.093	128.97	79.3685	0.615403
18.7918	998.532	129.248	79.3326	0.613803
18.8057	999.088	129.539	79.9081	0.616864
18.8196	999.536	129.786	80.3382	0.619005
18.8334	999.064	130.497	80.371	0.615884
18.8473	999.136	130.959	80.9836	0.618391
18.8612	999.216	131.052	81.451	0.621516
18.8751	998.982	131.496	81.4586	0.619475
18.889	998.8	131.937	82.4073	0.624596
18.9029	998.8	132.619	82.554	0.622491
18.9168	998.8	132.843	82.5568	0.621463
18.9307	998.6	133.801	82.556	0.617005
18.9446	999.208	134.1	83.1313	0.619921
18.9584	1000.1	134.4	83.0458	0.617901
18.9723	996.476	135.45	83.6493	0.617567
18.9862	1005.1	134.846	83.2396	0.617292
19.0001	1016.13	133.162	83.2598	0.625254
19.014	1005.73	135.218	83.9063	0.620528
19.0279	1008.03	135.368	84.3872	0.623391
19.0418	1008.4	136.239	84.3421	0.619074
19.0557	1008.72	136.477	84.9349	0.622337
19.0696	1008.2	136.823	85.1227	0.622138
19.0834	1008.61	136.911	85.4074	0.623816
19.0973	1008.8	137.491	85.38	0.620984
19.1112	1008.62	138.768	85.3723	0.615216
19.1251	1008.73	138.928	85.9782	0.618867
19.139	1009	138.815	86.2671	0.621456
19.1529	1009.3	137.487	86.2781	0.627534
19.1668	1009.78	125.923	84.4149	0.670367
19.1807	1010.39	107.707	79.7474	0.740411
19.1946	1010.83	89.3157	72.755	0.814583
19.2084	1010	75.6811	67.9748	0.898174
19.2223	1009.8	70.684	61.9095	0.875862
19.2362	1009.05	66.267	57.7752	0.871855
19.2501	1009	63.6252	55.2047	0.867655
19.264	1008.63	62.1342	52.7883	0.849584
19.2779	1008.6	60.0531	50.5209	0.841271
19.2918	1008.02	58.75	48.2821	0.821823
19.3057	1008.08	57.2708	46.934	0.819511
19.3196	1008.14	56.0978	45.7466	0.81548
19.3334	1008.2	54.9376	44.3965	0.808127
19.3473	1008.6	54.6365	42.9764	0.786588
19.3612	1008.4	53.9292	42.058	0.779875
19.3751	1008.52	53.3539	41.7409	0.78234
19.389	1007.38	52.8945	41.3246	0.781264
19.4029	1007.29	52.8499	40.7034	0.770169
19.4168	1007.8	52.5073	40.2257	0.766098
19.4307	1007.8	52.1968	39.8142	0.762769
19.4446	1007.8	52.0291	39.6008	0.761126
19.4584	1007.64	52.0364	39.6062	0.761126
19.4723	1007.85	51.7305	39.1338	0.756493
19.4862	1007.99	51.5502	38.9306	0.755198
19.5001	1007.87	51.6616	38.5102	0.745432
19.514	1007.89	51.0248	38.5149	0.754826
19.5279	1008.26	50.6989	38.5011	0.759407
19.5418	1008.33	50.1653	38.0449	0.758391
19.5557	1008.23	49.861	37.6381	0.754859
19.5696	1008.74	49.6635	37.4022	0.753113
19.5834	1008.64	49.6684	37.4059	0.753113
19.5973	1008.69	49.1493	36.943	0.751648
19.6112	1008.21	49.2216	36.7601	0.746829
19.6251	1008.6	47.5072	37.257	0.784239
19.639	1008.6	48.6727	36.3268	0.746348
19.6529	1009	48.5681	35.8469	0.738075
19.6668	1008.48	48.1593	35.8681	0.74478
19.6807	1008.2	48.2756	35.4712	0.734764
19.6946	1008.09	47.3819	35.2671	0.744316
19.7084	1008.2	47.3743	35.2615	0.744316
19.7223	1008.25	47.0776	34.7961	0.739121
19.7362	1007.95	46.868	34.8079	0.742681
19.7501	1008.8	46.3619	34.1696	0.737017
19.764	1008.73	46.4295	33.8577	0.729229
19.7779	1008.6	45.8382	33.7034	0.73527
19.7918	1008.53	45.8404	33.7051	0.73527
19.8057	1009.03	45.3394	33.071	0.72941
19.8196	1008.54	45.2756	32.6211	0.7205
19.8334	1008.26	45.0101	32.0189	0.711371
19.8473	1008.58	44.3615	32.0047	0.721454
19.8612	1008.6	44.222	31.3386	0.708666
19.8751	1008.38	43.6973	30.9279	0.707776
19.889	1008.4	43.1206	30.6786	0.711461
19.9029	1008.51	42.5724	30.3149	0.712079
19.9168	1008.25	42.0342	30.0098	0.713937
19.9307	1008.49	42.1194	29.5954	0.702655
19.9446	1008.87	41.5585	29.2228	0.703173
19.9584	1008.66	41.1744	28.3028	0.687387
19.9723	1008.54	41.2503	27.992	0.67859
19.9862	1009.1	40.3135	27.8207	0.690107
20.0001	1008.4	39.8666	27.2298	0.683022
20.014	1008.24	39.5247	26.9231	0.681171
20.0279	1008.2	39.0961	26.5666	0.67952
20.0418	1008.2	38.5534	26.1479	0.678226
20.0557	1008.2	38.419	25.8432	0.672668
20.0696	1008.2	38.0974	25.4851	0.668945
20.0834	1008.37	37.5467	25.061	0.667464
20.0973	1007.98	37.0419	24.6076	0.664318
20.1112	1008.2	36.8691	24.4546	0.663282
20.1251	1007.91	36.5649	23.9931	0.65618
20.139	1008	36.0423	23.5254	0.652717
20.1529	1007.5	35.8736	23.0722	0.643152
20.1668	1007.4	35.2234	23.0766	0.655149
20.1807	1008	35.0425	22.4432	0.640455
20.1946	1008.51	34.9405	21.9671	0.6287
20.2084	1007.97	34.5267	21.9822	0.636672
20.2223	1008.14	34.0535	21.3591	0.627221
20.2362	1007.86	33.8489	20.9002	0.617456
20.2501	1008.17	33.5261	20.8951	0.62325
20.264	1008.16	33.6234	20.4896	0.609385
20.2779	1007.86	32.7304	20.2842	0.619737
20.2918	1008.02	32.8434	19.8217	0.603523
20.3057	1008.19	32.2005	19.8145	0.615348
20.3196	1008.12	32.1586	19.196	0.596919
20.3334	1008.34	31.7173	19.1939	0.605155
20.3473	1008.07	31.8031	18.8944	0.594105
20.3612	1007.69	31.2174	18.7424	0.600383
20.3751	1007.8	31.3708	18.1275	0.577844
20.389	1008	30.3938	18.1726	0.597903
20.4029	1007.8	30.4247	18.0788	0.594214
20.4168	1007.8	30.2206	17.6578	0.584296
20.4307	1008.16	30.2027	17.6513	0.584429
20.4446	1008.57	30.0183	17.1312	0.570691
20.4584	1008.06	29.408	17.0366	0.57932
20.4723	1008.08	29.4846	16.7316	0.567469
20.4862	1008.2	28.5649	16.5721	0.580157
20.5001	1007.8	28.5761	16.5786	0.580157
20.514	1008	28.3289	16.2722	0.574402
20.5279	1007.83	28.3755	16.1137	0.567874
20.5418	1007.6	28.3823	16.1176	0.567874
20.5557	1007.6	27.4233	16.121	0.58786
20.5696	1007.69	27.5805	15.4986	0.561942
20.5834	1008.22	27.5657	15.4903	0.561942
20.5973	976.536	27.9238	15.5147	0.555606
20.6112	976.536	28.3735	15.5134	0.546757
20.6251	976.536	29.8658	15.5036	0.519109
20.639	976.536	27.2347	15.5163	0.569726
20.6529	976.536	27.9234	15.5144	0.555606
20.6668	976.4	27.9282	15.5171	0.555606
20.6807	976.93	27.5921	15.0914	0.546946
20.6946	977.15	27.2005	14.8672	0.546581
20.7084	977.4	26.7451	14.8652	0.55581
20.7223	977.2	26.4465	14.3897	0.544105
20.7362	977.2	26.2675	14.1855	0.540038
20.7501	977.386	25.7225	13.7499	0.534545
20.764	977.483	25.7125	13.7482	0.534692
20.7779	977.016	25.7644	13.6012	0.527907
20.7918	976.8	25.8547	13.278	0.513562
20.8057	977.2	25.0624	13.7964	0.550482
20.8196	976.8	25.6442	13.2786	0.517803
20.8334	976.8	25.3574	12.6482	0.498797
20.8473	976.8	25.3592	12.6395	0.498419
20.8612	976.693	24.3724	12.644	0.518782
20.8751	976.971	24.3655	12.6404	0.518782
20.889	976.488	24.377	12.6464	0.518782
20.9029	976.4	24.4195	12.4941	0.511645
20.9168	976.446	24.5031	12.1672	0.496559
20.9307	976.625	24.1674	12.1654	0.503379
20.9446	976.246	24.1763	12.1699	0.503379
20.9584	976.6	24.1675	12.1654	0.503379
20.9723	976.664	24.2482	11.8516	0.488762
20.9862	976.4	24.0099	11.5805	0.482322
21.0001	975.953	24.3353	11.5357	0.47403
21.014	975.8	23.3204	11.6977	0.501608
21.0279	975.6	23.3252	11.7001	0.501608
21.0418	975.937	23.3176	11.6963	0.501608
21.0557	975.6	23.3259	11.7004	0.501608
21.0696	975.8	23.3739	11.493	0.491702
21.0834	975.8	23.4871	11.0577	0.470799
21.0973	975.412	23.0669	11.063	0.479603
21.1112	976.808	22.5909	11.048	0.489048
21.1251	976.576	22.8007	11.0504	0.484655
21.139	976.2	23.0341	11.054	0.479898
21.1529	976.536	22.848	10.8971	0.476938
21.1668	976.331	22.9378	10.5732	0.460952
21.1807	976.557	22.9323	10.5707	0.460952
21.1946	976.226	22.2789	10.5757	0.474694
21.2084	975.986	22.285	10.5786	0.474694
21.2223	976.324	22.2762	10.5744	0.474694
21.2362	976.414	22.2755	10.574	0.474694
21.2501	976.37	22.2752	10.5739	0.474694
21.264	976.2	22.2794	10.5759	0.474694
21.2779	976.2	22.4461	9.93629	0.442673
21.2918	976.317	22.4429	9.93485	0.442673
21.3057	976.701	21.7735	9.93243	0.45617
21.3196	976.147	21.7856	9.93797	0.45617
21.3334	975.932	21.7909	9.94036	0.45617
21.3473	975.971	21.7895	9.93971	0.45617
21.3612	976.2	21.8237	9.78359	0.448302
21.3751	975.951	21.7927	9.93403	0.455843
21.389	975.754	21.7949	9.94217	0.45617
21.4029	976.238	21.2471	9.45854	0.445168
21.4168	976.668	21.2377	9.45433	0.445168
21.4307	976.6	21.2389	9.45489	0.445168
21.4446	976.528	21.2411	9.45588	0.445168
21.4584	976.736	21.2363	9.45372	0.445168
21.4723	976.264	21.0357	9.45878	0.449654
21.4862	976.852	21.2334	9.45246	0.445168
21.5001	976.548	20.9174	9.4564	0.452084
21.514	976.6	21.0287	9.45567	0.449654
21.5279	977.088	20.7404	9.2468	0.445834
21.5418	976.841	20.4086	8.81512	0.431933
21.5557	976.466	20.4167	8.81864	0.431933
21.5696	976.752	20.4108	8.8161	0.431933
21.5834	976.432	20.4176	8.81903	0.431933
21.5973	977.6	20.3936	8.80867	0.431933
21.6112	976.216	20.4218	8.82085	0.431933
21.6251	976.894	20.408	8.81486	0.431933
21.639	976.868	20.4075	8.81466	0.431933
21.6529	977.592	19.7329	8.80983	0.446454
21.6668	977.531	19.8571	8.3376	0.419881
21.6807	977.17	19.8664	8.33438	0.419522
21.6946	976.81	19.8736	8.33741	0.419522
21.7084	976.4	19.882	8.34095	0.419522
21.7223	976.428	19.8815	8.34071	0.419522
21.7362	976	19.8899	8.34424	0.419522
21.7501	976.4	19.8822	8.34103	0.419522
21.764	976.248	19.885	8.34221	0.419522
21.7779	975.985	19.8907	8.34458	0.419522
21.7918	976.634	19.877	8.33883	0.419522
21.8057	976.786	19.8737	8.33745	0.419522
21.8196	976.511	19.6686	8.34032	0.424043
21.8334	976.681	19.2147	8.33955	0.43402
21.8473	976.6	19.2169	8.34053	0.43402
21.8612	976.8	19.3794	7.69952	0.397304
21.8751	976.904	19.3769	7.69851	0.397304
21.889	977.051	19.3742	7.69746	0.397304
21.9029	976.888	19.3774	7.69871	0.397304
21.9168	976.739	19.3803	7.69988	0.397304
21.9307	976.308	19.389	7.70332	0.397304
21.9446	976.593	19.3836	7.70119	0.397304
21.9584	976.664	19.3817	7.70044	0.397304
21.9723	976.128	19.3925	7.7047	0.397304
21.9862	976.178	19.3917	7.70439	0.397304
22.0001	976.766	18.7321	7.70055	0.411087
22.014	976.426	18.8068	7.39019	0.392953
22.0279	976.481	18.7245	7.7032	0.411398
22.0418	976.368	18.7262	7.7039	0.411398
22.0557	976.348	18.8089	7.39101	0.392953
22.0696	976.936	18.8398	7.21995	0.383229
22.0834	976.754	18.844	7.22158	0.383229
22.0973	976.412	18.8504	7.22401	0.383229
22.1112	976.788	18.8434	7.22133	0.383229
22.1251	976.4	18.8509	7.2242	0.383229
22.139	976.194	18.8544	7.22555	0.383229
22.1529	976	18.8589	7.22727	0.383229
22.1668	976.132	18.8563	7.22629	0.383229
22.1807	976.572	18.8468	7.22264	0.383229
22.1946	976.407	18.8502	7.22393	0.383229
22.2084	976.571	17.8691	7.22433	0.404293
22.2223	976.276	17.8676	7.2266	0.404453
22.2362	976.524	17.9764	6.79003	0.377719
22.2501	975.8	17.8767	7.23027	0.404453
22.264	976.128	18.0368	6.58799	0.365254
22.2779	975.532	18.0485	6.59228	0.365254
22.2918	975.974	18.0398	6.5891	0.365254
22.3057	975.8	18.0434	6.59041	0.365254
22.3196	975.8	18.0432	6.59034	0.365254
22.3334	977.328	18.0148	6.57997	0.365254
22.3473	977.328	18.998	6.57816	0.346256
22.3612	977.328	18.332	6.5798	0.358924
22.3751	954.4	19.2868	7.3817	0.382733
22.389	954.754	19.2775	7.38769	0.383229
22.4029	955.2	18.2625	7.38631	0.404453
22.4168	954.4	18.2761	7.3918	0.404453
22.4307	954.4	18.2772	7.39228	0.404453
22.4446	954.6	18.2731	7.39058	0.404453
22.4584	954.945	18.4351	6.74308	0.365773
22.4723	955.049	18.4356	6.73367	0.365254
22.4862	955.191	18.4324	6.7325	0.365254
22.5001	955.178	18.4324	6.73249	0.365254
22.514	954.684	18.4423	6.73611	0.365254
22.5279	955.099	18.434	6.73308	0.365254
22.5418	954.968	18.0986	6.73463	0.372107
22.5557	954.424	18.5626	6.73779	0.362978
22.5696	954.859	18.3237	6.73502	0.367558
22.5834	954.47	18.4389	6.73753	0.365397
22.5973	954.797	18.4401	6.73531	0.365254
22.6112	954.469	18.331	6.7377	0.367558
22.6251	954.926	18.4307	6.73451	0.365397
22.639	954.8	18.1016	6.73575	0.372107
22.6529	954.428	18.1092	6.73855	0.372107
22.6668	954.156	18.1143	6.74047	0.372107
22.6807	954.976	17.9757	6.7346	0.37465
22.6946	954.859	17.2361	7.40367	0.429545
22.7084	954.615	18.1051	6.73702	0.372107
22.7223	954.714	18.1034	6.73639	0.372107
22.7362	954.712	18.1037	6.73651	0.372107
22.7501	954.532	18.233	6.2538	0.342993
22.764	954.132	18.2425	6.24987	0.3426
22.7779	954.749	18.2307	6.24583	0.3426
22.7918	955.4	18.2185	6.24167	0.3426
22.8057	955	17.5493	6.2451	0.35586
22.8196	955.2	17.5462	6.24398	0.35586
22.8334	954.784	17.5533	6.24651	0.35586
22.8473	954.344	17.5615	6.24946	0.35586
22.8612	954.357	17.5608	6.24918	0.35586
22.8751	954.328	17.5615	6.24943	0.35586
22.889	954.504	17.5581	6.24822	0.35586
22.9029	954.965	17.5501	6.24539	0.35586
22.9168	954.574	17.5578	6.24811	0.35586
22.9307	954.4	17.5606	6.24912	0.35586
22.9446	954.416	17.5606	6.24911	0.35586
22.9584	954.4	17.5605	6.24909	0.35586
22.9723	954.168	17.6486	5.93018	0.336014
22.9862	954.432	17.6874	5.75833	0.32556
23.0001	954.371	17.6891	5.75887	0.32556
23.014	954.435	17.6879	5.75848	0.32556
23.0279	954.6	17.6847	5.75743	0.32556
23.0418	954.706	17.6825	5.75673	0.32556
23.0557	954.348	17.0198	5.75991	0.338424
23.0696	954.264	16.6752	5.76076	0.345469
23.0834	954.597	16.67	5.75898	0.345469
23.0973	954.4	16.673	5.76	0.345469
23.1112	954.591	16.6698	5.7589	0.345469
23.1251	954.037	16.6794	5.76222	0.345469
23.139	953.572	16.688	5.7652	0.345469
23.1529	953.92	16.2823	6.02539	0.370058
23.1668	954.276	16.6577	5.77158	0.346481
23.1807	954.212	16.6764	5.76119	0.345469
23.1946	954.059	16.6792	5.76214	0.345469
23.2084	953.874	16.683	5.76346	0.345469
23.2223	953.8	16.7946	5.33592	0.317716
23.2362	955.2	16.7747	5.31072	0.316591
23.2501	954.307	16.8432	5.1153	0.303701
23.264	954.289	16.9608	5.10648	0.301076
23.2779	954.224	16.847	5.10706	0.303144
23.2918	954.436	16.8432	5.10592	0.303144
23.3057	954.436	16.8431	5.1059	0.303144
23.3196	954.308	16.8456	5.10663	0.303144
23.3334	954	16.8503	5.10805	0.303144
23.3473	954.872	16.836	5.10372	0.303144
23.3612	954.913	16.1585	5.10432	0.315891
23.3751	954.813	16.1598	5.10472	0.315891
23.389	954.6	16.1636	5.10594	0.315891
23.4029	954.763	16.1604	5.10491	0.315891
23.4168	954.235	16.1696	5.10782	0.315891
23.4307	954.454	16.1661	5.10672	0.315891
23.4446	954.536	16.165	5.10636	0.315891
23.4584	954.2	16.1703	5.10805	0.315891
23.4723	954.168	16.171	5.10828	0.315891
23.4862	953.406	16.1836	5.11226	0.315891
23.5001	953.596	16.1807	5.11134	0.315891
23.514	954.024	16.3892	5.10864	0.311708
23.5279	954.449	16.1659	5.10664	0.315891
23.5418	954.202	16.1699	5.10792	0.315891
23.5557	954.208	16.1701	5.10799	0.315891
23.5696	953.6	16.1803	5.11122	0.315891
23.5834	953.743	16.1774	5.1103	0.315891
23.5973	953.961	16.2188	4.9392	0.304535
23.6112	954.2	16.1699	5.10793	0.315891
23.6251	954.4	16.6241	4.62258	0.278065
23.639	953.565	16.2646	4.79067	0.294546
23.6529	953.901	16.1752	5.10958	0.315891
23.6668	953.886	16.3014	4.6254	0.283742
23.6807	954.532	16.2924	4.61584	0.283312
23.6946	954.786	16.5186	4.61438	0.279345
23.7084	954.59	16.2918	4.61568	0.283312
23.7223	955.2	16.0442	4.61308	0.287523
23.7362	955.163	16.2816	4.61277	0.283312
23.7501	953.976	16.8393	5.102	0.302983
23.764	954.092	23.5418	7.30974	0.310501
23.7779	954.4	28.446	10.1838	0.358005
23.7918	954.2	30.128	12.4223	0.412316
23.8057	954.308	35.6442	15.2297	0.427271
23.8196	954.169	46.1182	19.6972	0.427103
23.8334	955.254	54.5978	25.3534	0.464367
23.8473	955.664	58.7551	30.5543	0.520029
23.8612	955.8	59.0486	34.0609	0.576829
23.8751	956.226	53.5961	34.859	0.650402
23.889	956.4	45.1896	32.3687	0.716288
23.9029	956.548	37.316	28.4346	0.761994
23.9168	956.108	31.7745	24.3688	0.766928
23.9307	955.032	31.8917	20.668	0.648068
23.9446	954.755	35.2748	20.2633	0.57444
23.9584	955.612	35.8315	20.2433	0.564958
23.9723	955.463	34.2706	19.7612	0.576621
23.9862	954.596	36.6996	19.9271	0.542978
24.0001	954.263	44.4194	22.0139	0.495592
24.014	955.224	53.6309	26.0626	0.485962
24.0279	955.608	61.0093	30.7068	0.503314
24.0418	955.68	68.4211	35.4001	0.517386
24.0557	956.152	73.4756	39.4872	0.537419
24.0696	955.943	80.4001	43.427	0.540137
24.0834	955.656	82.3368	46.5966	0.565926
24.0973	955.572	85.7347	48.9159	0.570549
24.1112	955.692	91.6359	51.3577	0.560454
24.1251	956.376	94.091	53.8231	0.572032
24.139	956.552	97.0314	55.6899	0.573937
24.1529	957.048	93.2575	56.7507	0.608538
24.1668	956.4	88.5844	56.1925	0.634339
24.1807	956.2	91.4724	55.0206	0.601499
24.1946	956.366	95.2113	55.6255	0.584232
24.2084	956.744	93.6355	55.6187	0.593992
24.2223	957.134	94.6035	55.9099	0.590992
24.2362	957.2	91.3514	55.4068	0.606524
24.2501	957.083	89.5542	54.5012	0.608584
24.264	956.837	93.6374	54.4688	0.581699
24.2779	957.246	96.5011	54.9069	0.568977
24.2918	957.231	94.2605	55.5755	0.589595
24.3057	957.308	96.316	55.559	0.576841
24.3196	957.819	94.6321	55.5467	0.586975
24.3334	957.452	94.2179	55.5729	0.589833
24.3473	957.233	96.1807	55.5636	0.5777
24.3612	958.548	97.5797	56.1737	0.57567
24.3751	958	99.6882	57.1111	0.572898
24.389	958.8	97.2687	58.0688	0.596994
24.4029	957.632	97.1664	58.3102	0.600107
24.4168	959	97.6811	58.2197	0.596018
24.4307	958.4	101.575	58.6456	0.57736
24.4446	958.988	102.079	59.5254	0.583132
24.4584	958.8	103.425	60.4525	0.584507
24.4723	958.732	100.823	60.4913	0.599973
24.4862	958.996	100.115	60.4826	0.604133
24.5001	958.802	99.1633	60.5091	0.610196
24.514	959.392	102.807	60.8537	0.591921
24.5279	959.587	102.629	61.5594	0.599827
24.5418	959.727	103.881	62.1795	0.598564
24.5557	960.028	99.6221	62.1606	0.623964
24.5696	959.468	98.2052	61.4092	0.625315
24.5834	959.912	97.5523	61.1042	0.626373
24.5973	960.352	101.936	61.2919	0.601278
24.6112	960.324	101.76	62.0629	0.609897
24.6251	960.934	102.117	62.1294	0.608413
24.639	960.834	97.6524	61.7626	0.632474
24.6529	960.557	96.7469	61.4074	0.634722
24.6668	960.512	99.6421	61.527	0.61748
24.6807	960.874	103.274	61.7868	0.598278
24.6946	961.174	104.454	62.7335	0.600587
24.7084	961.892	103.441	63.0293	0.609323
24.7223	961.8	101.561	63.0574	0.620884
24.7362	962.584	101.554	63.6581	0.626839
24.7501	961.454	103.289	63.7119	0.616833
24.764	962.8	104.565	64.0945	0.612961
24.7779	962.2	105.79	64.9306	0.613768
24.7918	962.915	102.798	65.2527	0.634767
24.8057	963	102.004	64.7634	0.634909
24.8196	962.8	104.293	64.7503	0.62085
24.8334	962.774	107.686	65.1921	0.605389
24.8473	963.052	110.4	66.1184	0.5989
24.8612	963.6	106.088	66.7451	0.629151
24.8751	963.766	102.537	65.8511	0.642221
24.889	963.416	102.653	64.8965	0.632192
24.9029	963.768	106.17	64.6608	0.609029
24.9168	963.75	108.892	65.1122	0.597951
24.9307	964.388	107.028	66.0676	0.617293
24.9446	963.6	101.997	65.0565	0.637827
24.9584	963.67	101.801	64.7203	0.635754
24.9723	964.2	107.454	64.9379	0.604333
24.9862	964.2	111.125	66.0767	0.594616
25.0001	964.4	108.452	66.8663	0.616551
25.014	964.456	100.68	66.2258	0.657788
25.0279	963.972	101.549	65.0343	0.640422
25.0418	964.8	106.909	64.5824	0.604088
25.0557	965.4	109.255	64.5107	0.590462
25.0696	965.584	107.736	64.3118	0.596937
25.0834	966.4	100.702	62.7757	0.62338
25.0973	966	99.9319	61.3419	0.613837
25.1112	966.132	105.209	61.4676	0.584242
25.1251	966.668	108.44	62.646	0.5777
25.139	966.821	109.091	63.285	0.58011
25.1529	967	102.274	63.1445	0.617408
25.1668	967.088	98.741	62.2571	0.630509
25.1807	967.112	102.858	61.6613	0.599478
25.1946	967.156	105.777	61.725	0.58354
25.2084	967.497	107.188	62.1293	0.57963
25.2223	967.754	100.241	61.7677	0.616194
25.2362	967.304	97.4187	60.3139	0.61912
25.2501	968.072	99.8038	59.9094	0.600272
25.264	968.2	101.892	60.1952	0.590774
25.2779	968.672	104.91	60.6138	0.577769
25.2918	969.128	100.804	60.962	0.604756
25.3057	968.6	97.1129	60.6148	0.624168
25.3196	968.636	98.6606	59.8867	0.606997
25.3334	968.779	101.689	59.8423	0.588485
25.3473	969.104	107.565	59.5883	0.553975
25.3612	970	104.026	59.7409	0.574288
25.3751	970.032	100.296	59.78	0.596038
25.389	970.432	103.035	59.7236	0.579645
25.4029	970.4	105.669	60.497	0.572516
25.4168	970.412	107.347	61.2851	0.570908
25.4307	970.852	101.819	60.8404	0.597537
25.4446	970.852	99.1329	59.5838	0.60105
25.4584	970.852	100.943	59.2362	0.586829
25.4723	977.869	109.129	59.9253	0.549123
25.4862	977.784	112.71	62.0796	0.550792
25.5001	978.808	106.908	62.9936	0.589232
25.514	978.2	106.972	63.68	0.595299
25.5279	978.8	108.485	63.7734	0.587853
25.5418	978.673	111.413	64.0769	0.575128
25.5557	979.095	109.515	64.0684	0.585019
25.5696	978.848	103.18	62.6819	0.607503
25.5834	978.276	104.581	61.9423	0.59229
25.5973	978.5	108.187	61.8832	0.572005
25.6112	979.155	111.684	62.9211	0.563387
25.6251	979.759	105.529	62.9518	0.596535
25.639	979.2	102.194	62.1317	0.607978
25.6529	979.356	102.697	61.7378	0.601166
25.6668	979.787	103.57	61.3757	0.592598
25.6807	980.312	104.948	61.3256	0.584344
25.6946	980.912	98.9871	60.5207	0.6114
25.7084	980.2	96.9784	59.194	0.610384
25.7223	980.308	103.581	59.5234	0.574654
25.7362	980.538	112.455	60.9437	0.54194
25.7501	981.6	110.25	62.2917	0.565001
25.764	981.256	100.297	62.1129	0.619289
25.7779	981.072	100.755	60.7948	0.603393
25.7918	981.2	102.933	60.6521	0.589237
25.8057	981.304	106.998	61.0176	0.570268
25.8196	982.322	104.078	61.0041	0.58614
25.8334	981.852	99.7858	60.1763	0.603054
25.8473	983.296	102.229	59.8326	0.585279
25.8612	982.568	107.397	60.8281	0.566385
25.8751	983.368	108.306	62.6629	0.578575
25.889	983.351	105.835	62.2373	0.58806
25.9029	982.8	109.038	62.3884	0.572173
25.9168	982.8	112.562	63.7742	0.566571
25.9307	983.012	113.96	65.1213	0.57144
25.9446	983.188	110.309	65.5394	0.594143
25.9584	982.996	110.529	65.5497	0.593055
25.9723	982.992	110.541	66.0298	0.597333
25.9862	984.296	109.906	65.7955	0.598652
26.0001	984.641	106.226	65.4937	0.616551
26.014	984.456	104.139	64.5982	0.620308
26.0279	984.648	108.035	64.3573	0.59571
26.0418	985.2	112.491	65.3636	0.581058
26.0557	985.248	112.553	65.8523	0.585077
26.0696	985.2	109.54	66.3258	0.605496
26.0834	985.656	110.125	65.8521	0.597974
26.0973	985.853	112.207	65.8123	0.586527
26.1112	986	113.359	66.9019	0.590178
26.1251	985.917	109.672	66.4828	0.606197
26.139	986.132	109.417	65.8278	0.601622
26.1529	986.766	111.103	65.9667	0.593745
26.1668	986.571	113.699	66.3861	0.583873
26.1807	986.912	110.796	66.5586	0.600729
26.1946	987.102	108.842	66.4058	0.610112
26.2084	987.4	110.406	66.3646	0.601095
26.2223	987.8	113.151	66.6152	0.588731
26.2362	988.584	112.655	66.7319	0.592357
26.2501	989.2	108.347	66.2766	0.611706
26.264	988.528	109.962	66.2936	0.602877
26.2779	988.728	112.441	66.3997	0.590532
26.2918	988.424	114.497	67.343	0.588165
26.3057	988.991	110.011	66.9571	0.60864
26.3196	988.825	110.057	66.5958	0.605105
26.3334	989.063	111.714	66.7045	0.597103
26.3473	989.452	114.112	67.0671	0.587731
26.3612	990.368	111.245	66.8297	0.600743
26.3751	990.6	109.317	66.6466	0.609663
26.389	990.216	111.37	66.6352	0.598322
26.4029	990.832	113.686	66.767	0.587294
26.4168	990.883	113.291	67.2005	0.593169
26.4307	990.408	109.919	66.8588	0.608256
26.4446	991.001	110.892	66.8916	0.603213
26.4584	991.111	113.364	66.5605	0.587139
26.4723	991.248	113.348	67.1687	0.59259
26.4862	991.016	110.251	67.0249	0.607931
26.5001	990.996	110.845	66.5904	0.60075
26.514	991.688	111.839	66.5272	0.594847
26.5279	992.381	114.054	67.084	0.588177
26.5418	992.828	111.184	67.0893	0.60341
26.5557	992.6	109.462	66.7155	0.609485
26.5696	992.759	111.07	66.464	0.598397
26.5834	993.552	114.519	66.991	0.584978
26.5973	994.4	112.335	67.1319	0.597607
26.6112	995.196	108.709	66.7579	0.614097
26.6251	994.804	110.421	66.3351	0.60075
26.639	994.774	112.941	67.2443	0.595394
26.6529	994.732	114.492	67.5934	0.590375
26.6668	994.888	111.473	67.4288	0.604888
26.6807	994.637	113.247	67.4126	0.595272
26.6946	994.888	116.047	68.2936	0.588498
26.7084	995.156	117.849	69.5125	0.589842
26.7223	995.108	115.377	69.8671	0.605555
26.7362	995.569	116.2	69.9863	0.60229
26.7501	995.8	118.763	70.5593	0.594119
26.764	996.472	118.623	70.9927	0.598472
26.7779	996.576	116.937	71.6335	0.612582
26.7918	996.533	119.366	71.6052	0.599881
26.8057	996.8	121.48	72.2788	0.594986
26.8196	997.311	120.427	72.6362	0.603155
26.8334	997.096	119.264	73.1311	0.613185
26.8473	997.507	123.623	73.3567	0.593392
26.8612	998.316	125.558	74.2096	0.591037
26.8751	998.6	121.606	74.5668	0.613186
26.889	998.331	119.808	74.1405	0.618828
26.9029	998.221	120.423	74.1386	0.615653
26.9168	999.03	122.546	74.0485	0.604252
26.9307	999.173	118.58	73.6815	0.621363
26.9446	999.003	117.239	73.4975	0.626904
26.9584	999.25	118.735	74.078	0.623891
26.9723	999.592	121.115	74.9046	0.618459
26.9862	1010.7	117.24	74.1382	0.632364
27.0001	1010.7	116.294	72.6539	0.624745
27.014	1014.88	122.758	72.6157	0.591537
27.0279	1014.4	127.838	74.0558	0.579295
27.0418	1013.6	127.427	75.0438	0.588915
27.0557	1013.84	125.635	75.5251	0.601148
27.0696	1014.55	123.804	75.5002	0.609835
27.0834	1014.6	122.406	76.1249	0.621906
27.0973	1014.53	122.001	75.2223	0.61657
27.1112	1014.4	122.253	75.0681	0.61404
27.1251	1014.53	123.265	75.0427	0.608794
27.139	1014.55	123.835	75.2495	0.607661
27.1529	1014.99	123.521	75.0056	0.607231
27.1668	1015.46	124.289	75.4142	0.606764
27.1807	1015.4	125.539	75.8118	0.603888
27.1946	1015.7	125.769	75.9995	0.60428
27.2084	1016	125.837	76.4339	0.607404
27.2223	1016.07	126.431	76.4248	0.604479
27.2362	1016.07	126.943	76.8818	0.605639
27.2501	1016.67	127.493	76.8235	0.602569
27.264	1017.2	127.336	77.1896	0.606188
27.2779	1017.08	127.613	77.4104	0.606601
27.2918	1017.22	127.593	77.3982	0.606601
27.3057	1017.35	127.2	77.6976	0.610832
27.3196	1017.7	127.218	77.831	0.61179
27.3334	1019.17	127.242	77.714	0.610757
27.3473	1019.03	127.263	77.7266	0.610757
27.3612	1017.94	126.576	78.6627	0.621464
27.3751	1016.99	128.285	78.4767	0.611737
27.389	1016.4	128.304	78.8368	0.614451
27.4029	1016.4	128.537	78.6786	0.612107
27.4168	1016.2	128.904	79.0039	0.61289
27.4307	1016.14	129.529	78.9987	0.609894
27.4446	1015.8	129.57	79.0239	0.609894
27.4584	1016.38	129.499	78.9804	0.609894
27.4723	1015.83	129.309	79.2418	0.612811
27.4862	1016.14	129.432	79.4211	0.613612
27.5001	1016.55	129.334	79.5782	0.615292
27.514	1017.08	129.154	80.0075	0.619475
27.5279	1016.45	129.445	80.0583	0.618475
27.5418	1016.52	129.243	80.0542	0.61941
27.5557	1016.25	129.163	79.6147	0.616391
27.5696	1017.13	129.404	78.923	0.609894
27.5834	1016.93	129.422	78.9338	0.609894
27.5973	1017.33	129.729	79.609	0.613655
27.6112	1017.91	130.948	80.1125	0.611787
27.6251	1018.74	132.187	80.4458	0.608574
27.639	1019.22	132.744	80.3965	0.605649
27.6529	1019.48	133.33	80.3691	0.602783
27.6668	1020.18	133.737	80.7591	0.603865
27.6807	1020.69	134.754	81.3262	0.603515
27.6946	1021.51	135.828	81.8488	0.602591
27.7084	1021.28	137.526	82.1525	0.597359
27.7223	1022.13	137.843	82.9939	0.602089
27.7362	1021.47	137.827	83.4074	0.605159
27.7501	1021.8	139.518	83.7658	0.600395
[truncated: 6,642 more rows]

## Sheet: Offline data
process time (h)	Biomass dryweight (g/L)	Protein activity (U/mL)	Total extracellular soluble protein concentration (g/L)	Specific growth rate (1/h)
0	0.05	0	0	0.25	Batch phase
20.5834	21.4	0	0.38	0.14	Fedbatch phase
30.7362	56.8	0	0.81	0.0124222	Adaptation phase
40.4307	62.5	0.289	0.902631	0.000989647	Induction phase
51.6529	58.575	0.67	1.06689	0.0104938	Induction phase
64.1112	62.325	3.294	1.1279	0.00748059	Induction phase
75.389	62.825	8.209	1.36374	0.0124745	Induction phase
87.9723	67.175	14.507	1.63631	0.00852027	Induction phase
100.167	66.575	19.258	1.8827	0.00916241	Induction phase
111.972	68.625	25.176	1.99351	0.00456366	Induction phase
124.111	66.675	29.254	1.99816	0.0100533	Induction phase
